## 14 **Abstract**

15 Root-knot nematode (RKN, *Meloidogyne javanica*) presents a great challenge to *Solanaceae*  
16 crops, including the potato. In this report, we conducted an investigation to understand the  
17 transcriptional regulation of molecular responses in potato roots during a compatible  
18 interaction following RKN infection. In this study, analysis of gene expression profiles using  
19 RNA-seq of *Solanum tuberosum* cv Mondial with RKN interaction at 0, 3- and 7-days post-  
20 inoculation (dpi). In total, 4,948 and 4,484 genes were respectively detected as differentially  
21 expressed genes (DEGs) at 3 and 7 dpi. Functional annotation revealed that genes associated  
22 with metabolic process were enriched at the transcriptional level suggesting they have an  
23 important role in RKN disease development. Nematode infection caused down-regulation of  
24 282 genes associated with pathogen perception hence interfering with activation plant immune  
25 system. Further, late activation of pathogenesis-related genes, down-regulation disease  
26 resistance genes and activation of host antioxidant system contributed to a susceptible response.  
27 Activation of Jasmonic acid (JA) pathway and protease inhibitors was due to wounding during  
28 nematode migration and feeding. Nematode infection suppressed ethylene (ET) and salicylic  
29 acid (SA) signalling pathway hindering SA/ET responsive genes involved with defense.  
30 Induction of auxin biosynthesis genes, regulation of cytokinin levels and up-regulation of  
31 transporter genes facilitated of nematode feeding sites (NFSs) initiation. The regulation of  
32 several families of transcription factors (TFs) in the plant, such as WRKY, GRAS, ERF BHLH  
33 and MYB, was affected by RKN infection disrupting plant defense signalling pathways. This  
34 clearly suggest that TFs played an indispensable role in physiological adaptation for successful  
35 RKN disease development. This genome-wide analysis revealed the molecular regulatory  
36 networks in potato roots which are successfully manipulated by RKN. Being the first study  
37 analysing transcriptome profiling of RKN diseased potato, it will provide unparalleled insight  
38 into the mechanism underlying disease development.

39 **Key words:** Root-knot nematode, *Solanum tuberosum*, nematode feeding sites, differentially  
40 expressed genes

## 41 **Introduction**

42 Potato, *Solanum tuberosum* (L) belongs to the *Solanaceae* family, which comprises several  
43 economically important crops such as tomato, pepper, aubergine, and tobacco. Plant parasitic  
44 nematodes particularly root-knot nematodes, are among the most destructive and economically  
45 important pests of potatoes worldwide (Scurrah et al., 2005, Jones et al., 2017). In this context,

46 *Meloidogyne* spp are obligate and highly polyphagous pests that form an intricate relationship  
47 with their host causing drastic morphological and physiological changes in plant cell  
48 architecture (Gheysen & Fenoll, 2002). A typical life cycle of RKNs spans between 4-6 weeks  
49 depending on the nematode species and environmental conditions. Following the embryonic  
50 phase, the infective second-stage juveniles (J2s) hatch from the egg. At 3dpi the nematodes  
51 have already penetrated the host root tips and migrating towards the elongation zone  
52 (Castaneda et al., 2017). At this stage the J2s select target cells to initiate reprogramming of  
53 host cells to giant cells (GCs). The nematodes are completely dependent on the induced GCs  
54 for supply of nutrients. During the induction stage the parasitic J2 abandons its migratory  
55 lifestyle becomes sedentary to concentrate on feeding, development and reproduction (Bartlem  
56 et al., 2013). As the GCs enlarge, surrounding cells undergo rapid division causing swelling of  
57 roots and discontinuity of the vascular tissue. The sedentary nematode further moults into J3,  
58 J4 stages and finally into the adult stage when the nutrient acquisition stage commence from  
59 7dpi. The developing, nematode, GCs and surrounding tissue contribute to the formation of  
60 RKN symptom (Bartlem et al., 2013). Analogous to other plant pathogens, nematode secretions  
61 play a crucial role in manipulation of the host cellular function. Secreted molecules suppress  
62 host defense to initiate a successful infection process including establishment and maintenance  
63 of NFSs (Hewezi & Baum, 2013). In the genus *Meloidogyne*, several effectors have been  
64 reported such as: MiLSE5, which interferes with host metabolic and signalling pathways; or  
65 MjTTL5, Misp12 and MgGPP, which suppress the host immune responses facilitating  
66 successful nematode parasitism (Vieira & Gleason, 2019).

67 Due to their capability to infect plant species from diverse families, RKN species pose a great  
68 challenge to crop production globally (Sasser & Freckman, 1987). In 2014, 22 species of RKN  
69 were reported in Africa causing damage to various vegetable and field crops (Onkendi et al.,  
70 2014). Both tropical and temperate RKN species are present in potato growing regions of  
71 South Africa with *M. javanica* and *M. incognita* being the prevalent species impairing the  
72 potato production sector (Onkendi & Moleleki, 2013). For decades the use of nematicides has  
73 been effective in managing RKN populations. However, their usage is coupled with adverse  
74 effects to the ecosystem. This has led to withdrawal of the most effective nematicides from the  
75 agro-markets, further aggravating crop losses due to RKN (Onkendi et al., 2014). Plant host  
76 resistance through the use of resistant cultivars is an effective and environmentally safe  
77 alternative method of controlling RKN species (Onkendi et al., 2014). Nevertheless, the current  
78 cultivated potato cultivar lack resistance against RKN (Dinh et al., 2015). Thus, studies

79 involving plant-nematode interactions will deepen our understanding of the molecular  
80 regulatory networks associated with resistance or susceptibility. The insights drawn from such  
81 studies will be useful in breeding programs to develop novel target-specific control strategies  
82 against nematodes.

83 RNA-Seq has become a powerful instrument for gene expression profiling and detection of  
84 novel genes (Wang et al., 2009, Oszolak & Milos, 2011) which has been used widely to study  
85 the expression profiles of RKN diseased Solanaceae plants (Xing et al., 2017, Li et al., 2018,  
86 Shukla et al., 2018). RNA-seq profiling has been used to decipher potato responses to various  
87 abiotic (Zuluaga et al., 2015, Gálvez et al., 2016) and biotic stresses (Kwenda et al., 2016, Yang  
88 et al., 2018) where large sets of genes and pathways associated with either biotic and abiotic  
89 stress were revealed. To date most research has focused on potato gene expression in response  
90 to potato cyst nematodes (Jolivet et al., 2007, Walter et al., 2018, Kooliyottil et al., 2019) while  
91 potato responses to RKN infection remain poorly understood. Here, we set out to evaluate the  
92 responses of potato cultivars to root-knot nematode infection. Our results revealed that seven  
93 commercially tested South African potato cultivars were susceptible to *M. javanica*. Further,  
94 in order to investigate the molecular basis of this compatible interaction, we employed RNA-  
95 Seq to analyse differential gene expression patterns in *Solanum tuberosum* cv. Mondial  
96 subjected to *M. javanica* infection at two early stages (3 and 7dpi).

## 97 **Results and Discussion**

### 98 **Susceptibility of potato cultivars to *Meloidogyne javanica***

99 In this study, we evaluated the susceptibility to RKN in seven commercially available potato  
100 cultivars in South Africa. The number of galls induced, and reproductive potential of the  
101 nematodes was used to assess the host status of the potato cultivars. Our results show that all  
102 the seven potato cultivars were efficient hosts to *M. javanica* as indicated by the high  
103 reproductive factor ( $R_f > 1$ ) (**Fig 1A**). This further supports the findings by Pofu and Mashela  
104 (2017) which concluded that South African potato cultivars are efficient hosts to *Meloidogyne*  
105 species. Based on the gall numbers, cultivars were classified as highly susceptible (BP1,  
106 Mondial and Lanorma), susceptible (Up-to-date, Sifra, and Valor), and moderately resistant  
107 (Innovator) (**Fig 1B**) according to the ranking scale coined by Taylor and Sasser (1978)  
108 *Meloidogyne Javanica* infection generally reduces plant growth and yield of potato (Vovlas et  
109 al., 2005). Similarly, RKN infection caused reduction in root length and shoot length in various  
110 potato cultivars compared to their corresponding controls (**Fig 1 C and D**). The reduced growth

111 is attributed to root injury caused during nematode penetration and feeding, which impairs the  
112 plant root systems, hence reducing the efficiency of roots to absorb water and nutrients. As a  
113 result, the top growth of the plant is reduced, and this explains the reduced shoot lengths.  
114 Interestingly, increased root length was recorded in four diseased cultivars in comparison to  
115 untreated controls. The production of secondary roots may be a characteristic of nematode  
116 infected plant's efforts to recompense for root injury (McDonald & Nicol, 2005). In addition,  
117 mature galls exhibited either a single or more egg masses, which indicates that *M. javanica*  
118 was infective on potato cultivars (**Fig 1E and F**). Therefore, nematodes were able to penetrate  
119 the host system, subdue the host defense responses during the entire infection process, complete  
120 their life cycle and reproduce.

### 121 **Transcriptome data analysis and functional annotation of differentially expressed genes**

122 Aiming to understand the molecular basis of this compatible interaction between RKN and  
123 potato, RNA sequencing was performed on the highly susceptible cultivar *Solanum tuberosum*  
124 cv Mondial. Two infection stages were selected for the analysis: 3 and 7 dpi. These time points  
125 correspond to nematode stages of induction of feeding sites at 3 dpi and nutrient acquisition  
126 stage that starts from 7 dpi to 8 weeks after infection (Bartlem et al., 2013). Approximately 1.3  
127 billion paired-end reads were generated yielding an average of 23 million high quality reads  
128 for individual samples. Successfully mapped reads onto the *S. tuberosum* reference genome  
129 (v4.03) (Consortium, 2011) accounted for 78-86% of the total of reads generated per sample  
130 (**Table S1**). Log<sub>2</sub> fold change  $\geq \pm 1$  and adjusted p-value (FDR)  $< 0.05$  were used as cut off  
131 values to obtain DEGs through pairwise comparison between the mock-inoculated samples and  
132 infected samples at 3 and 7 dpi. Overall, 4948 potato genes were differentially expressed at  
133 3dpi. Of these, 2867 were down-regulated and 2081 up-regulated. At 7dpi, 2871 and 1613  
134 genes were detected to be down and up-regulated respectively (**Fig 2A**). Collectively, 3108  
135 genes were regulated at both 3 and 7 dpi: 2069 down- and 1022 up-regulated. As biotrophic  
136 organisms, RKNs need to actively suppress the host defense during the infection process. This  
137 might explain the current observation where 57.75% of the DEGs (3,652 out of 6,324) were  
138 suppressed (**Fig 2A and B**).

139 GO enrichment analysis was performed using the AgriGo tool (Tian et al., 2017) to reveal the  
140 main regulatory trends in root tissues on the course of RKN infection. The GO terms were  
141 grouped into three main functional categories at adjusted *p-value*  $< 0.05$  and categorized using  
142 WEGO software (Ye et al., 2018). Within the biological process class, the highest percentage  
143 of the DEGs was down-regulated and fell under metabolic process category. Within this

144 category, we found the following sub-categories: Primary metabolic process, cellular metabolic  
145 process, biosynthetic process, oxidation-reduction process and regulation of metabolic process.  
146 Accordingly, past studies revealed that nematode infection modulates the expression of genes  
147 involved in metabolic activities, particularly the primary metabolic process due to the high  
148 demand for nutrients and energy (Hofmann et al., 2010). Other significant GO terms in this  
149 category include response to stimulus, cellular process, localization and signalling processes  
150 and regulation of biological processes (**Fig 3 and S2 Table**).

### 151 **Plant signal transduction, pathogen perception, and defense-related genes are modulated** 152 **by *M. javanica* infection**

153 Plants have developed the innate immune system to inhibit pathogen invasion and  
154 multiplication. Pattern triggered immunity (PTI) (plants first line of defence) relies on  
155 perception of pathogen/damage-associated molecular patterns (PAMPs/DAMPs) by pattern  
156 recognition receptors (PRRs) (Zipfel, 2014, Macho & Zipfel, 2014). Plant PRRs are either  
157 surface localized receptor-like proteins (RLPs) or receptor-like kinases (RLKs) that perceive  
158 and transmit danger signals to activate defense response (Zipfel, 2014). In this study, genes  
159 encoding for RLKs and RLPs (e.g. serine-threonine protein kinase, leucine-rich repeat (LRR)  
160 receptor-like protein kinase) and wall-associated receptor kinases (WAKs) were detected  
161 among the DEGs. The majority of the PRRs (68.28%) were repressed by nematode infection  
162 at 3 and/or 7 dpi following nematode infection (**Fig 4A and S3 Table**). Previous reports show  
163 that phytonematodes are able to induce plant basal defense responses through recognition by  
164 large arsenals of plant receptors (Peng & Kaloshian, 2014, Teixeira et al., 2016, Mendy et al.,  
165 2017). Mendy et al. (2017) reported the first surface localized LRR receptor-like kinase  
166 (NLR1) that was up-regulated in response to nematode attack in *Arabidopsis*. *Arabidopsis*  
167 *nilr1* mutants were found to be hyper susceptible to a wide range of phytonematodes (Mendy  
168 et al., 2017). Similarly, our results revealed that six out of seven WAK-encoding genes were  
169 down-regulated by nematode infection (**Fig 4A and S3 Table**). The WAK proteins perceive  
170 danger signals to activate PTI responses (Ferrari et al., 2013). Past research shows that WAK  
171 proteins are important components of potato disease resistance against various microbes  
172 (Kwenda et al., 2016, Yang et al., 2018). For instance, WAK genes were induced in a tolerant  
173 cultivar (BP1) which correlated with enhanced perception of *Pectobacterium brasiliense*  
174 (formerly *Pectobacterium carotovorum* subsp *brasiliense*) (Kwenda et al., 2016). Similarly,  
175 WAK genes were up-regulated conferring resistance to *Phytophthora infestans* in potato  
176 genotype SD20 (Yang et al., 2018) Additionally, plants defective of PRRs or PTI signaling



177 components are typically susceptible to both adapted and non-adapted microbes (Macho &  
178 Zipfel, 2014). This notion is confirmed by *M. javanica* ability to interfere with the functioning  
179 of RLKs, RLPs and WAK genes lead to successful disease development.

180 Transmission of perceived signals from the PRRs is mediated through the MAPK cascade and  
181 calcium (Ca<sup>2+</sup>) signaling pathway which transfers downstream components of plant immunity.  
182 Here, we found the expression of MAPKs genes was largely repressed (20 out of 22 genes) by  
183 nematode infection (**Fig 4B and S3 Table**). The MAPK cascade basically entails three-tiered  
184 kinases (a) a MAP kinase kinase kinase (MAPKKK) (b) a MAP kinase kinase (MAPKK), and  
185 (c) the MAP kinase (MAPK) which mediates transmission of extracellular signals to activate  
186 an appropriate defense output (Jagodzik et al., 2018). The role of MAPK in plant defense  
187 against nematodes has been demonstrated previously. It was reported by Zhang et al. (2017)  
188 and Postnikova et al. (2015) that the induction of MAPK genes leads to resistance against cyst  
189 nematode and RKN, respectively in soybean plants. Further, *M. javanica* repressed 91.6% of  
190 the genes involved in Ca<sup>2+</sup> signaling pathway (33 out of 36) (**Fig 4C and S3Table**). This  
191 includes calmodulin (CaM), calcineurin B-like proteins (CBL), Ca<sup>2+</sup> dependent kinases (CPKs)  
192 and Ca<sup>2+</sup> receptors that transmit Ca<sup>2+</sup> signatures into a specific cellular and physiological  
193 response after a pathogen challenge (Zhang et al., 2014). Takabatake et al. (2007) demonstrated  
194 that repression of CaM/CML members' expression or loss of function in mutated plants  
195 strongly affects immunity. Furthermore, in plant-nematode interaction, calcium burst was  
196 associated with the release of ROS causing cell death and inhibiting establishment of (GCs) in  
197 potato (Davies et al., 2015). In connection to this, our results indicate that *M. javanica* ability  
198 to repress MAPK and Ca<sup>2+</sup> pathways interfered with the transmission of signals responsible for  
199 activation of precise and prompt defense response, hence a susceptible response.

200 NBS-LRR disease resistance proteins have been implicated in mediating resistance against  
201 various phytonematodes (Williamson & Kumar, 2006). In our study, 114 disease resistance  
202 genes (out of the 641 in the potato genome) (Sharma et al., 2013) were differentially expressed  
203 following root knot nematode infection. The highest proportion of these proteins (54.35%)  
204 including NBS-LRR disease resistance proteins, was repressed at 3 and/or 7 dpi (**Fig 4D and**  
205 **S3 Table**). Similarly, repression of 12 NBS-LRR genes by cereal cyst nematode in wheat led  
206 to a susceptible response (Qiao et al., 2019). Altogether, down-regulation of resistance genes  
207 indicates repression of plant resistance by *M. javanica* infection.

208 Apart from the activation of MAPK and Ca<sup>2+</sup> signaling, PTI activation is associated with  
209 expression of pathogenesis related (PR) proteins. In this study, we found the expression of  
210 several PR proteins under the regulation of *M. javanica* including 11 chitinase encoding genes  
211 (PR-3 and PR-4). The PR-3 and PR-4 are markers for JA-mediated defense response with 8  
212 genes specifically up-regulated at 7dpi (**Fig 5A and S3 Table**). In a similar fashion, it has been  
213 previously reported that increased chitinase activity do not correlate with resistance in potato  
214 to potato cyst nematode (Wright et al., 1998). Therefore, chitinase might be functioning as a  
215 signalling molecule to stimulate other PR proteins, or alternatively, its induction may be due  
216 to wounding response (Wright et al., 1998). Regarding SA-responsive genes (PR-1 and PR-5),  
217 14 were up-regulated and 11 were down-regulated by nematode infection specifically at 7dpi  
218 (**Fig 5A and S3 Table**). According to previous studies, the PR-5 transcripts were induced  
219 following RKN and CN infection in *S. lycopersicum* and *Brassica nigra*, respectively (Sanz-  
220 Alférez et al., 2008, van Dam et al., 2018). These observations are corroborated in the current  
221 study where the majority of thaumatin-like and osmotin genes (55.82%) were induced by  
222 nematode infection. Moreover, the stimulation of PR-5 protein has been associated with  
223 osmotic stress induced during nematode invasion (Sanz-Alférez et al., 2008). Generally, there  
224 was delayed activation of the PR genes as the majority of the PR encoding genes were induced  
225 at 7 dpi. This could reflect the strategy adopted by the RKN to suppress PR encoding genes in  
226 early stages of colonization to ensure successful nematode infection.

227 Rapid generation of reactive oxygen species (ROS) is one of the early PTI cellular events that  
228 trigger a number of defense responses such as activation of several defense genes and cell wall  
229 reinforcement (Goverse & Smant, 2014) In this study, NADPH oxidase, respiratory burst  
230 homologue (RBOHs) and peroxidases, which are important players in production of ROS in  
231 plants, were differentially regulated both at 3 and 7dpi (**Fig 5B and S3 Table**). Genes encoding  
232 for peroxidases (30 genes) were repressed to a larger extent at 7 dpi than at 3 dpi (**Fig 5B and**  
233 **S3 Table**). This implies that *M. javanica* suppresses ROS-mediated defense signaling during  
234 induction and acquisition of nutrients in the GCs. In addition, two genes coding for 2-oxoacid-  
235 dependent dioxygenase were down-regulated at 3 and/or 7 dpi. 2-oxoacid-dependent  
236 dioxygenase enzyme mediates a variety of oxidative reactions and synthesis of secondary  
237 metabolites (Prescott & Lloyd, 2000) and has toxic effects on a wide range of pathogens  
238 including phytonematodes (Hansen et al., 2008). Genes encoding for 2OG-Fe (II) oxygenase  
239 superfamily were up-regulated (23 genes out of 34) following nematode infection in this study  
240 (**Fig 5B and S3 Table**). Patel et al. (2010) reported that the interaction between host 2OG-Fe



241 (II) oxygenase and a nematode effector HS4F01 increased the plant susceptibility to cyst  
242 nematode. This illustrates that *M. javanica* effectors might interact with the host proteins  
243 responsible for oxidative responses hence interfering with ROS mediated defense signaling.

244 Genes encoding for glutathione, glutaredoxin, thioredoxin, peroxiredoxins, ascorbate and  
245 peroxidases comprise plant's antioxidant network, which is responsible for controlling ROS  
246 levels (Laporte et al., 2012). These genes were differentially regulated by nematode infection  
247 in this study (**Fig 5B and S3 Table**). Emerging evidence shows that RKN can utilize the host  
248 ROS scavenging system to reduce the damaging effects of oxygen species (Lin et al., 2016,  
249 Guan et al., 2017). Here, we detected one gene encoding for peroxiredoxin  
250 (PGSC0003DMG401002721), the main detoxifying antioxidant enzyme in the plant-nematode  
251 interface (Goverse & Smart, 2014), being up-regulated at both timepoints (**Fig 5B and**  
252 **S3Table**). In addition, 16 out of 23 genes encoding for glutathione S transferase (GST) and UDP-  
253 Glycosyltransferase (6 out of 9 genes) (**S3 Table**) were up-regulated following *M. javanica*  
254 infection (**Fig 5B and S3Table**). Qiao et al. (2019) reported that CN nematode can utilize the  
255 GST and UDP-Glycosyltransferase antioxidant enzymes to ameliorate the ROS effects as well  
256 control plant defense. In this context, it is likely that in the current interaction, the nematode  
257 activated host antioxidant mechanism to interfere with defense response and to avoid the  
258 harmful effect of ROS molecules.

### 259 **Nematode responsive transcription factors**

260 Several transcription factors (TFs) were detected as DEGs in response to *M. javanica* infection.  
261 This includes ERF (77), MYB and MYB-related (62), bHLH (49), bZIP (23), WRKY (33) and  
262 GRAS (32). In total, these differentially expressed TFs represent 75% of the TFs found in *S.*  
263 *tuberosum*. Most of the differentially expressed TFs in the current data set were down-regulated  
264 (298/532) after nematode infection (**Fig 6A and S4 Table**). Classification and identification of  
265 the differentially expressed TFs was attained from the Plant Transcription Factor Database  
266 (<http://planttfdb.cbi.pku.edu.cn/> v .4.0) (Jin et al., 2016). Transcription factors (TFs) are key  
267 regulators of plant response to various biotic stress in potato. For instance, in response to *P.*  
268 *brasiliense* infection in potato, 4 families of TFs (WRKY, bHLH, MYB, and AP2/ERF) were  
269 regulated (Kwenda et al., 2016). Similarly, in potato, several TFs were found to be important  
270 regulators of resistance response against *P. infestans* (Yang et al., 2018).

271 The ERF TFs are associated with hormone signal transduction of salicylic acid (SA), jasmonic  
272 acid (JA) ethylene (ET), and PR via binding to the GCC box of target genes that positively or  
273 negatively regulate transcription of various stress responses (Li et al., 2017). In this study, most

274 of the genes encoding for AP2/ERF TF family were down-regulated (70.37%) at 3 and/or 7  
275 dpi. In addition, 15 genes were suppressed to a greater extent at 7 than 3 dpi (**Fig 5C and S4**  
276 **Table**). This could be ascribed to the secretion of nematode effectors and subsequent  
277 suppression of defense response associated with the activation of AP2/ERF TFs. Among the  
278 down-regulated ERF TFs we found 7 genes encoding DREB (out of 9 DREB genes), which  
279 are regarded as main regulators of abiotic stress responses (Zhou et al., 2010). (**Fig 6C and S4**  
280 **Table**). Qiao et al. (2019) recently reported that two genes encoding for DREB were strongly  
281 repressed in wheat following a compatible interaction with CN. This indicates that DREB  
282 genes may regulate signaling pathways associated with defense response to nematode  
283 infection. This can be subjected to further analysis to identify their specific role in plant-  
284 nematode interactions. Further, we found three ERF6 TFs activated in response to *M. javanica*  
285 infection (**Fig 6C and S4 Table**). In this context, ERF6 has been described to positively  
286 regulate JA/ET and resistance against *Botrytis cinerea* in *A. thaliana* (Moffat et al., 2012). In  
287 addition, Warmerdam et al. (2019) showed that ERF6 regulates *M. incognita* disease  
288 development in *A. thaliana*. ERF6-mutated plants recorded a higher number of RKN egg  
289 masses indicating a role of ERF6 in enhancing host susceptibility to *M. incognita* as a result of  
290 deteriorated plant defenses (Warmerdam et al., 2019). In this case, ERF6 TFs have a role in  
291 mediating potato susceptibility to RKN. Our findings indicate that down-regulation of  
292 AP2/ERF TFs following nematode infection could have debilitated plant defense through  
293 targeting the defense signaling pathways regulated by the AP2/ERF family of TFs.

294 It is generally accepted that pathogen-directed modulation of WRKY genes in plants is an  
295 important aspect that enhances success rates of pathogen infection. Cyst nematode's successful  
296 infection process in *A. thaliana* roots was attributed to the nematode's control over the  
297 expression of WRKY genes (Ali et al., 2014). In agreement with that notion, we found 23 genes  
298 down-regulated WRKY-encoding genes, including *WRKY40*, *WRKY23*, and *WRKY29* at both  
299 infection stages (**Fig 6B and S4 Table**). In cotton plants, *GhWRKY40* has been reported to  
300 regulate wounding and resistance response against *Ralstonia solanacearum* (Wang et al.,  
301 2014). Furthermore, the up-regulation of *WRKY23* influenced an early resistance response to  
302 *M. incognita* infection in cucumber plants (Ling et al., 2017). It has also been reported that in  
303 *Arabidopsis*, *AtWRKY29* is an important constituent of MAPK mediated defense pathway  
304 against microbes (Asai et al., 2002). Here we detected 20 genes encoding for MAPK  
305 suppressed by nematode infection. The suppression of *WRKY29* might have influenced the  
306 expression of *MAPK* genes interfering with transmission of signals that elicit a defense  
307 response. Moreover, we found *WRKY75* to be up-regulated by nematode infection at 7dpi. In

308 tomato, *SlyWRKY75* regulates the JA-signal transduction system (López-Galiano et al., 2018)  
309 indicating activation of the JA pathway by *M. javanica* infection. Our data reveals that RKN  
310 interferes with important defense signaling components such as MAPK and JA pathways  
311 eliciting a susceptible response through down regulation of WRKY TFs.

312 Among the 34 down-regulated MYB TFs (**S4 Table**), we found three genes encoding for  
313 MYB108 at 3 and 7 dpi. *Arabidopsis* AtMYB108 has been characterized as an important  
314 regulator of both biotic and abiotic stresses (Mengiste et al., 2003) It is also known that the  
315 expression of *GhMYB108* in cotton, responds to application of defense-related phytohormones  
316 such as SA, JA and ET (Cheng et al., 2016). The absence of *GhMYB108* led to increased  
317 susceptibility of cotton plants to *Verticillium dahliae* infection while its ectopic overexpression  
318 enhanced tolerance to the fungal pathogen (Cheng et al., 2016). This would, therefore, indicate  
319 that down-regulation of MYB108 coding genes interfered with the defense signaling pathway  
320 leading to a compatible response. MYC2, MYC3, and MYC4 from the bHLH family are a part  
321 of the JA signal transduction system (Pireyre & Burow, 2015). bHLH activates various sets of  
322 plant genes in response to environmental factors such as phytohormone signaling, and  
323 development (Pireyre & Burow, 2015). Here, we found 49 genes encoding for bHLH TFs with  
324 a total of 23 up-regulated and 24 down-regulated in response to RKN infection (**S4 Table**).  
325 Our results indicate that nematode infection interferes with these important regulators of JA  
326 mediated defenses by blocking the expression of some of the bHLH TFs responsible for  
327 mounting sufficient defense responses against *M. javanica*.

328 Out of 71 GRAS representatives in the potato genome, 32 were differentially expressed  
329 following nematode infection in the present data set, out of which 65.63% were up-regulated  
330 (**Fig 6D and S4 Table**). This includes 17 scarecrow-like (SCL) encoding genes important for  
331 root physiology (Hirsch & Oldroyd, 2009). A nematode effector conserved in *Meloidogyne*  
332 spp. acts as a signalling molecule that specifically targets the plant SCL transcription regulators  
333 to induce root proliferation (Huang et al., 2006). Therefore, our results support the notion that  
334 the induction of SCL led to increased cell proliferation in the roots, which is essential for GCs  
335 induction and expansion. Further, we detected three nodulation-signaling pathway (NSP) genes  
336 1 and 2 under positive regulation (**Fig 6D and S4 Table**). In addition, we found that genes  
337 encoding nodulin-like proteins were either induced (7 genes) or repressed (5 genes) by  
338 nematode infection (**S5 Table**). It has been reported previously that RKN can invoke similar  
339 host signals involved during the formation of nodules necessary for nitrogen fixation (Favery  
340 et al., 2002). In various phytopathosystems, nodulin-like genes are involved in solute supply

341 during these interactions (Denancé et al., 2014). In the same way, nematode infection might  
342 have induced nodulin-like genes and their transcriptional regulators NSP1 and NSP2 in the  
343 GRAS family to aid in solute transportation in the GCs, a crucial process for a successful  
344 nematode infection. overall, our results show that potato susceptibility to RKN is controlled at  
345 the transcriptional level by a complex gene regulatory network.

#### 346 **Nematode responsive phytohormones**

347 Plant hormone signal transduction pathways are typically targeted by pathogens to either  
348 disrupt or avoid plant defense responses. Pathogen invasion results in changes in various plant  
349 hormone levels (Bari & Jones, 2009). In this context, our study shows that nematode infection  
350 influenced the expression of genes associated with the synthesis of JA, SA, ET, auxin,  
351 gibberellic acid (GA) and cytokinin (CK) signaling pathways (**Fig 7 and S5 Table**). Salicylic  
352 acid signaling pathway positively regulates immunity to biotrophic parasites while JA and ET  
353 hormones usually function synergistically to regulate defense against necrotrophic microbes  
354 and herbivorous insects (Bari & Jones, 2009). Differential expression of genes involved in the  
355 phenylpropanoid metabolic pathway was detected including three key enzymes, one gene  
356 encoding phenylalanine ammonia lyase (HAL), and one encoding trans-cinnamate (C4H, 3  
357 genes) were repressed at 3 and 7dpi. Further, two genes encoding 4-coumarate-CoA ligase  
358 (4CL1) were repressed at 7 dpi and one gene slightly activated at 3dpi during RKN disease  
359 development (**S3 Table**), which can affect other downstream activities such as SA, lignin and  
360 flavonoids biosynthesis (Vogt, 2010). Here, we detected regulation of genes in the flavonoid  
361 biosynthetic pathway, including chalcone synthase (induced, one gene), chalcone-flavone  
362 isomerase and flavanol sulfotransferase-like (repressed, one gene) at 3 and 7dpi (**S5 Table**).  
363 Moreover, enzymes that participate in lignin biosynthesis were detected including cinnamyl  
364 alcohols dehydrogenase (CAD, one gene) and lignin-forming anionic peroxidase (five genes)  
365 were repressed in response to RKN. O-methyltransferase encoding genes in the lignin pathway  
366 were either slightly up-regulated or down-regulated at 3 and/or 7dpi (**S5 Table**). This  
367 demonstrates the involvement of phenylpropanoid metabolic pathway in RKN disease  
368 development.

369 For SA signalling, chorismate mutase (one gene) and SA-carboxyl methyltransferase (one  
370 gene) encoding genes implicated in SA synthesis (D'Maris Amick Dempsey et al., 2011) were  
371 down-regulated following nematode infection in addition to differential regulation of a gene  
372 encoding for key enzymes of PAL pathway (**S5 Table**). Further, a subset of the WRKY family  
373 specifically involved in SA signalling pathway (i.e. WRKY70, WRKY40, WRKY17, and

374 WRKY8) was suppressed according to our data set (**Fig 6B and S4 Table**). These genes are  
375 important regulators of SA-dependent responses and have been implicated in the antagonistic  
376 crosstalk between SA-JA pathways (Pieterse et al., 2012) indicating repression of SA pathway  
377 by RKN infection.

378 Genes encoding for enzymes involved in the JA-signaling pathway were largely down-  
379 regulated. These include genes encoding allene oxide synthase (AOS 2 genes), allene oxide  
380 cyclase (AOC, one gene), lipoxygenase (LOX, 3 genes) and 12-oxophytodienoate (12-OPR, 5  
381 genes) (**Fig 7A and S5 Table**). The LOX pathway mediates resistance against pathogens,  
382 insects, and nematodes (Gao et al., 2008). Gleason et al. (2016) demonstrated that the 12-OPR  
383 enzyme, a JA-precursor, is a vital defense-signaling molecule that mediates plant immunity  
384 against nematodes. Moreover, plants incapable of producing JA or 12-oxo-phytodienoic acid  
385 (OPDA) are more susceptible to phytonematodes (Gleason et al., 2016). In this perspective,  
386 the down-regulation of LOX and 12-OPR enzymes in the current study might have played a  
387 role in initiating a susceptible interaction through interfering with JA-mediated defense  
388 pathway. In addition, jasmonate O-methyltransferase, an additional regulatory point for the  
389 accumulation of jasmonate derivatives in the cytoplasm and production of signal transmitters  
390 other than JA (Seo et al., 2001) was up-regulated according to our dataset (**Fig 7A and**  
391 **S5Table**). Interestingly, 5 genes of the TIFY protein family, which includes jasmonate-Zim-  
392 domain protein 10 (JAZ10), that represses JA signaling pathway, were down-regulated in this  
393 study (**Fig 7A and S5 Table**). This indicates the activation of this pathway although not  
394 sufficient to mount the defense against RKN. Apart from pathogen and herbivory attack, the  
395 JA pathway can be activated as result of wounding. It also enhances accumulation of protease  
396 inhibitors which hinder exogenous proteases from insects to halt their development and  
397 reproduction (Koo & Howe, 2009). It is likely that JA-mediated defenses are effective against  
398 phytonematodes. However, the strong induction of several classes of protease inhibitors in our  
399 study (**S7 Table**) did not correlate with RKN resistance. Thus, the activation of the JA signaling  
400 pathway in this study might be due to wounding caused by nematode migration and feeding  
401 rather than by defense response.

402 Activation of the ET pathway upon pathogen attack leads to accumulation of defense-related  
403 through a cascade of events leading to activation of ERF TFs (van Loon et al., 2006). In the  
404 current data set, genes encoding for key enzymes involved in ethylene biosynthesis including  
405 1-aminocyclopropane-1-carboxylate (ACC, 4 genes) synthase and 1-aminocyclopropane-1-  
406 carboxylate (ACO, 5 genes out of 8 genes) were down-regulated. We also detected three up-  
407 regulated membrane receptors (which perceive ET) at 3 and/or 7dpi (**Fig 7B and S5 Table**).



408 This includes ETHYLENE RESPONSE1 and 2 (ETR1 and ETR2) and ETHYLENE  
409 RESPONSE SENSOR2 (ERS2) negative regulators of ET responses (Ju & Chang, 2015)  
410 suggesting ET suppression. Further, ETHYLENE INSENSITIVE3 BINDING F-BOX (EBF)  
411 proteins (2 genes) that degrade EIN3/ETHYLENE INSENSITIVE3-LIKE1 (EIL) key positive  
412 regulators of ET responses (Ju & Chang, 2015) were activated in our data set (**Fig 7B and S5**  
413 **Table**). Our results show that apart from suppressing ET synthesis genes, RKN induced both  
414 negative regulators of ET responses and EBF responsible for proteasomal degradation of  
415 EIN3/EIL TFs that positively regulate ET responsive genes. This hindered the activation of  
416 defense-related genes associated with ERF branch of TFs.

417 Auxin stimulates several changes such as cell wall ingrowths, cell cycle activation and cell  
418 expansion occurring in nematode feeding sites (Gheysen & Mitchum, 2018). Here, we found  
419 51 auxin signaling genes differentially expressed, including tryptophan aminotransferase-  
420 related protein 4 (auxin biosynthesis), GH3.3 and SAUR family (auxin-responsive genes),  
421 auxin repressors (e.g. IAA13, IAA19) and auxin transporters (e.g. TIR, LAX1) (**Fig 7C and**  
422 **S5 Table**). It has been recently reported that nematode invasion results in induced auxin  
423 biosynthesis and responsive genes while genes encoding for repressors are switched off  
424 (Gheysen & Mitchum, 2018). Similar to this scenario, in our dataset, auxin repressors were  
425 repressed further highlighting the importance of auxin manipulation in nematode parasitism.  
426 Overall, *M. javanica* modulates auxin signaling pathway to facilitate successful formation of  
427 GCs.

428 Cytokinin and auxin hormones have been implicated in the induction and development of NFS  
429 (Gheysen & Mitchum, 2018). In the present study, genes involved in CK signaling pathway  
430 were differentially expressed. These include cytokinin dehydrogenase and cis-zeatin O-  
431 glucosyltransferase involved in CK homeostasis, of which 5 genes out of 7 were induced at 3  
432 and/or 7 dpi (**Fig 7D and S5 Table**). Cytokinin dehydrogenase is involved in the degradation  
433 of CK. Transgenic plants overexpressing this enzyme had decreased gall formation and  
434 consequently reduced susceptibility to nematode infection (Lohar et al., 2004, Siddique et al.,  
435 2015). Due to their involvement in nutrient mobilization and cell division, CKs are believed to  
436 play a role in formation and maintenance of NFS infection (Lohar et al., 2004, Siddique et al.,  
437 2015). Our study shows that RKN regulates CK levels by regulating genes associated with the  
438 homeostasis of CK further underlining the significance of CK in GCs formation.



439 Next, our RNA-seq data revealed differential expression of the genes encoding for enzymes  
440 involved in GA biosynthesis including 3 up-regulated GA2OX1 encoding genes, and 5 down-  
441 regulated at both infection stages. Two genes encoding for DELLA proteins, which are  
442 negative regulators of GA response, were up-regulated while GA receptors were either up (2  
443 genes) or down-regulated (one gene) by nematode infection at 3 and 7dpi (**Fig 7E, S5, and S4**  
444 **Table**). GA2OX1 enzymes reduce endogenous GA content in *Arabidopsis* plants that  
445 stimulates plant elongation process (Lee et al., 2014, Hu et al., 2017). A similar observation  
446 was made on tomato and rice plants, where GA2OX and GA receptors were strongly activated  
447 following RKN attack (Bar-Or et al., 2005, Kyndt et al., 2012). Further supporting this notion,  
448 GA foliar application on tomato plants enhanced resistance to *M. javanica* (Moosavi, 2017).  
449 Collectively, these results show that *M. javanica* modulates GA signaling process by activating  
450 GA2OX1 enzymes and GA repressors, which reduce the active GA and stimulate root  
451 elongation that might be essential during GCs induction (Fuchs et al., 2013).

452 Several components of ABA stress-responsive hormone signaling, including ABA receptors,  
453 protein phosphatase 2C (PP2C) and SNF1-related protein kinases (SNRK) were differentially  
454 regulated in the present data set (**S5 Table**). Genes encoding for PP2Cs were repressed (26 out  
455 of 38) by nematode infection according to our data set (**S3 Table**). PP2Cs encoding genes are  
456 major players in stress signalling (Fuchs et al., 2013) that transmit ABA signaling directly from  
457 receptors to their downstream regulators. The SNRK regulators then activate an  
458 ABF/AREB/AB15 clade of bZIP-domain TFs through protein phosphorylation process finally  
459 to induce physiological ABA response (Sun et al., 2011). Apart from regulating stress responses  
460 and plant development, members of bZIP TF family are also implicated in plant defense  
461 response (Singh et al., 2002). In this study 23 bZIP genes were differentially expressed with  
462 14 genes activated and 9 genes repressed (**Table S4**). Therefore, we can hypothesize that  
463 nematode infection modulates the main stress-signaling pathway through repression of ABA  
464 receptors, which blocks the expression of some of the bZIP TFs responsible for defense  
465 response initiation.

#### 466 **Genes associated with metabolic activities and transport activity are regulated by *M.*** 467 ***javanica* infection**

468 As obligate biotrophs, RKN fully depends on host-derived nutrients and solute transport to  
469 establish feeding sites. The differentiation of giant cells is coupled with massive changes in  
470 structure and metabolism of the host cells (Siddique & Grundler, 2015). GO enrichment  
471 analyses showed that genes involved in primary metabolism and cellular metabolism were

472 overrepresented among the down-regulated genes (**S2 Fig and S1 Table**). Repression of these  
473 genes might be a strategy adopted by the host to save energy which is diverted for defense  
474 responses (Rojas et al., 2014). For instance, in this study, genes associated with lipid  
475 metabolism such as GDSL esterases/ lipases were repressed (14 genes) by nematode infection  
476 at both infection stages (**Fig 8A and S6 Table**). Lipid and their metabolites have a role in  
477 mediating plant resistance (Gao et al., 2017). This indicates that *M. javanica* interfered with  
478 the host lipid-based defenses when initiating a compatible interaction. Nematode infection is  
479 associated with drastic reorganization of infected plant cells as well reprogramming of plant  
480 primary metabolism (Hofmann et al., 2010). It is also believed that nematodes may trigger  
481 biosynthesis of essential nutrients for their development, hence new metabolic pathways maybe  
482 induced in the host plants (Hofmann et al., 2010). Other genes in plant primary metabolism  
483 category under differential regulation of RKN parasitism include glycolytic process, trehalose  
484 metabolism, fatty acid biosynthetic process, sucrose and protein metabolism (**S6 Table**).  
485 Similar to other studies, our transcriptomic data revealed that 165 genes encoding for cell wall  
486 modifying/degrading enzymes (CWM/DEs) annotated under the carbohydrate metabolic  
487 processes were differentially expressed. This includes genes encoding for glucan endo-1-3  
488 beta-glucosidase, xyloglucan endo-transglycosylase, expansins, and extensins which were  
489 differentially expressed at 3 and/or 7dpi by RKN infection (**Fig 8B and S6 Table**) This shows  
490 that the regulation of these CWD/MEs is important during cell wall modification in the NFS.  
491 Glucan endo-1-3beta-glucosidase (members of PR-2 protein family) were differentially  
492 expressed with 14 genes down-regulated and 6 genes up-regulated at 3 and/7 dpi in this study  
493 (**Fig 8B and S6 Table**). These cell wall modifying enzymes and also linked to plant defense  
494 against pathogens (van Loon et al., 2006). Callose deposition of a 1,3- $\beta$  glucan polymer is one  
495 of the first events occurring during pathogen invasion to slow down its progression (Voigt,  
496 2014). Therefore, suppression of Glucan endo-1-3beta-glucosidase genes by nematode  
497 infection interferes with callose formation as well as plant defense. Among the 14 repressed  
498 genes encoding for xyloglucan endo-transglycosylase, two genes (PGSC0003DMG400004670  
499 and PGSC0003DMG400021877) were induced by nematode infection at 7dpi (**Fig 8B and S6**  
500 **Table**) suggesting a tight regulation of CWMEs during GCs formation. Similarly, 3 expansin  
501 encoding genes were specifically up-regulated at 7 dpi. (**Fig 8B and S6 Table**). Shukla et al.  
502 (2018) also demonstrated the up-regulation of genes encoding for expansins between 5 and 7  
503 dpi in a susceptible tomato response to RKN. Expansins are cell wall loosening proteins that  
504 might play key role during the expansion of GCs (Gheysen & Mitchum, 2008). In addition,  
505 genes encoding for hydrolytic enzymes involved in pectin degradation such as

506 polygalacturonase (PG), pectate lyases (PL) and pectin esterase (PE) were differentially  
507 expressed at 3 and 7 dpi by nematode infection (**Fig 8B and S6 Table**). Pectin degradation  
508 leads to plant tissue maceration that is essential in disease development (Lionetti et al.,  
509 2012). Therefore, the reduction of pectin content may increase nutrient accessibility to  
510 nematodes (Jammes et al., 2005). Furthermore, four genes encoding pectin methyl esterase  
511 inhibitor (PMEI or PEI) were down-regulated upon nematode challenge at 3 and 7 dpi (**Fig 8B**  
512 **and S6 Table**). Plants produce PMEI in an effort to counteract the increasing pectin methyl  
513 esterase (PME) upon pathogen attack (Lionetti et al., 2012). Repression of PMEI by nematode  
514 attack shows that activity of PME was activated leading to the breakdown of pectin bonds,  
515 which increases the vulnerability of the cell wall to microbial pectic enzymes and other  
516 degrading enzymes and culminates in a susceptible response. Generally, the differential  
517 regulation of genes associated with cell wall architecture suggests that *M. javanica* was able to  
518 break down plant cell wall to facilitate migration and formation of GCs. Furthermore, RKN  
519 interferes with defense role associated with the plant cell wall architecture leading to  
520 compatible interaction.

521 With the increased demand for nutrients in nematode feeding cells, nematodes deploy  
522 specialized membrane transporters to control the flow of nutrients in and out of the NFS  
523 (Rodiuc et al., 2014, Siddique & Grundler, 2015). In agreement with previous studies (Hammes  
524 et al., 2005, Shukla et al., 2018), we found that several families of transporter genes were  
525 differentially regulated upon RKN infestation in our analyses. These include peptide  
526 transporters, aquaporins, amino acid transporters, ion transporters, sugar transporters and  
527 glutathione S transferase (**Fig 8C and S6 Table**). Overall, we found that 54.8% of transporter  
528 encoding genes in the DEGs were up-regulated following nematode infection. The activation  
529 of genes encoding amino acid transporters (8 genes) and sugar transporters (9 genes) indicates  
530 activation of amino acid and carbohydrate metabolism, respectively. For instance, according  
531 to Zhao et al. (2018), the induction of sugar transporters increases soluble sugar contents in  
532 RKN infected tomato plants, which is crucial for nematode development. Furthermore,  
533 multidrug transporter-encoding genes were differentially expressed in our samples as well (**Fig**  
534 **8C and S6 Table**), which encompasses ATP- binding cassette (ABC, 16 genes) and multidrug  
535 and toxin extrusion proteins (MATE, 17 genes). These are secondary active transporters  
536 involved in plant immunity and transporting and trafficking of xenobiotic, small organic  
537 molecules, and secondary metabolites (Peng et al., 2011). In a similar study involving tomato  
538 and *M. incognita*, 15 MATE efflux proteins exhibited differential expression (Shukla et al.,  
539 2018), nevertheless, their role in plant-nematode interaction is yet to be defined. Hence, it is

540 likely that nematodes recruit some of these transporters to flush out toxic secondary metabolites  
541 or to disperse nematode effectors produced following nematode invasion.  
542 Nematode effectors that target plant ubiquitin-proteasome system (UPS) have been reported  
543 previously (Rehman et al., 2009, Chronis et al., 2013). In the present study, we found that  
544 several genes involved in protein ubiquitination and proteolysis including the U-box domain  
545 (27 genes) RING finger protein (3 genes) zinc finger domain (8) and the F-box (30 genes) were  
546 down-regulated (**Fig 8D and S7 Table**). This could indicate an immense turnover of proteins  
547 due to constant nematode feeding leading to a compatible interaction. Wang et al. (2015)  
548 reported an enzyme E3 ligase, U-box/ARM repeat protein (OsPUB15) which interacts with a  
549 receptor-like kinase to regulate programmed cell death as well as disease resistance. Similarly,  
550 E3 ubiquitin ligase protein is known to control plant immunity to a broad range of microbes in  
551 rice through orchestrating plant immunity homeostasis and coordinating the trade-off between  
552 defense and growth in plants (You et al., 2016). Indeed, the findings further support that the  
553 UPS system might be a primary target to *M. javanica* effectors, which modulate the various  
554 facets of plant defense linked with the UPS system.  
555 Collectively, this study uncovers the molecular networks regulated during compatible  
556 interaction between potato and RKN. This provides further insights on plant-nematode  
557 interactions and will enhance further studies in this area including development of target-  
558 specific control strategies against *Meloidogyne* species.

559

## 560 **Materials and methods**

### 561 **Plant material and RKN inoculations**

562 Certified seed (tubers) of seven potato cultivars were grown under greenhouse conditions to  
563 evaluate resistance to *M. javanica* under greenhouse conditions. The seed tubers were pre-  
564 germinated in the dark  $20 \pm 3^{\circ}\text{C}$  for seven days to allow sprouting. Stocks of *M. javanica* were  
565 originally obtained from Dr. Pofu (ARC Roodeplaat, Pretoria, South Africa) and maintained  
566 on susceptible tomato cultivar, *S. lycopersicum* Cv Floradade in glasshouse environment with  
567 a temperature of  $24^{\circ}\text{C}$ - $30^{\circ}\text{C}$  for eight weeks. *Meloidogyne javanica* eggs were extracted from  
568 infected roots as described (Hussey, 1973). Egg suspension was poured onto an extraction tray  
569 for collection of second juveniles' (J2s) nematodes. Five- week old potato seedlings were  
570 inoculated with 1000 freshly hatched J2s per plant and control plant mock-inoculated with  
571 water. The number of galls using Taylor and Sasser (1978) ranking scale to determine  
572 susceptibility and reproduction factor (RF) using Sasser et al. (1984) RF formula was used to

573 assess the host status of potato cultivars to RKN infection 8 weeks after infection For RNA  
574 experiment, whole root tissues of a compatible potato cultivar were collected at 0, 3 and 7 days  
575 post-inoculation (dpi) with two biological replicates per time point. Samples were washed and  
576 immediately frozen in liquid nitrogen to prevent RNA degradation and later stored at -80 °C  
577 until RNA extraction.

#### 578 **RNA extraction, library preparation, and sequencing**

579 RNA extraction, library preparation, and sequencing were carried out at Novogene (HK)  
580 Company Limited. Total RNA for individual time course and replicates was extracted using  
581 TiaGen extraction kit (Biotech Beijing Co., Ltd) and treated with sigma DNase1 (D5025). RNA  
582 degradation and contamination was measured on 1% agarose gel while RNA purity was  
583 assessed using the NanoPhotometer<sup>®</sup> spectrophotometer (IMPLEN, CA, USA). RNA  
584 concentration and integrity were assessed using Qubit<sup>®</sup> RNA Assay kit in Qubit<sup>®</sup> 2.0  
585 Fluorometer (Life Technologies, CA, USA) and RNA Nano 6000 Assay Kit of the Bioanalyzer  
586 2100 system (Agilent Technologies, CA, USA), respectively. Three micrograms of RNA  
587 samples were used as input for library construction. Libraries were constructed using  
588 NEBNext<sup>®</sup> Ultra<sup>™</sup> RNA Library Prep Kit for Illumina<sup>®</sup> (NEB, USA) according to the  
589 manufacturer's instructions and index codes were added to attribute sequences to each sample.  
590 Finally, PCR products were purified using AMPure XP system and quality of the library  
591 assessed using the Agilent Bioanalyzer 2100 system. A cBot Cluster Generation System using  
592 HiSeq PE Cluster Kit cBot-HS (Illumina) was used to cluster the index-coded samples. After  
593 cluster generation, the library preparations were sequenced on an Illumina Hiseq platform 2500  
594 generating 150 bp paired-end reads.

#### 595 **Transcriptomic data analysis**

596 Quality analysis of sequenced reads were initially analyzed using FASTQC package ([https://](https://www.bioinformatics.babraham.ac.uk/projects/fastqc)  
597 [www.bioinformatics.babraham.ac.uk/projects/fastqc](https://www.bioinformatics.babraham.ac.uk/projects/fastqc)). Clean reads were obtained by removing  
598 reads containing adapter reads with poly-N and low-quality reads from raw data. Trimming of  
599 low-quality regions was performed using Trimmomatic v 0.36 (Bolger et al., 2014). All the  
600 subsequent downstream analyses were based on high- quality data. *Solanum tuberosum*  
601 genome v4.03 (Consortium, 2011) was used for reference-guided mapping of RNA-seq reads.  
602 Paired-end clean reads were aligned to the potato genome using hisat2 v 2.1.0 software (Kim  
603 et al., 2015). Unmapped reads were progressively trimmed at the 3' end and re-mapped to the  
604 genome. Next, featureCounts package (Liao et al., 2014) was used to perform raw-reads counts  
605 in R environment (<https://www.r-project.org/>). The read counts were then used for differential



606 expression analysis using edgeR package (Robinson et al., 2010). Further, to investigate the  
607 responses at different time points (3 dpi and 7 dpi), the expression profiles were compared to  
608 mock-inoculated (0dpi) data sets. The transcripts were then classified as differentially  
609 expressed genes (DEGs) based on both (a) false discovery rate (FDR) (Benjamini & Yekutieli,  
610 2005) cut-off of 0.05 and (b)  $\log_2$  fold change  $\geq 1$  or  $\leq -1$  for induced and repressed genes,  
611 respectively.

### 612 **Gene ontology (GO) and enrichment analysis**

613 The GO and enrichment analysis were performed using agriGO v.2.0 (Tian et al., 2017) and  
614 categorized by WEGO v 2.0 tool (Ye et al., 2018). Parametric gene set enrichment analysis  
615 based on differential expression levels ( $\log_2$  fold change) was performed and FDR correction  
616 was performed using the default parameters to adjust the *p*-value. Functional annotations and  
617 pathway analyses were obtained through sequence search performed on eggNOG database  
618 utilizing *eggmapper* (Huerta-Cepas et al., 2017). Annotations from eggNOG were then  
619 integrated with Kyoto Encyclopedia of Genes and Genomes (KEGG) database in order to reach  
620 pathway annotation level.

### 621 **Validation for DEGs by qRT-PCR**

622 For qRT-PCR, first-strand cDNA was done from total RNA using Superscript IV First-Strand  
623 cDNA Synthesis SuperMix Kit (Invitrogen, USA) following manufacturer's protocol.  
624 Quantitative real-time PCR was performed using SYBR Green Master Mix in the QuantStudio  
625 12k Flex Real-Time PCR system (Life Technologies, Carlsbad, CA, USA) to validate DEGs.  
626 Two micrograms of the sample was added to 5  $\mu$ l of Applied Biosystems SYBR Green Master  
627 Mix and primers at a concentration of 0.4  $\mu$ M. The implication cycle consisted of following:  
628 initial denaturation at 50 °C for 5 min and 95 °C for 2 min followed by 45 cycles of 95 °C for  
629 15 s and 60 °C for 1 min. Each sample was run in triplicates. Specific qRT-PCR primers for  
630 six target genes were designed using an online tool Prime-Blast  
631 (<http://www.ncbi.nlm.nih.gov/tools/primer-blast>) (**S8 Table**). Each sample was run in  
632 triplicates. The 18S rRNA and elongation factor 1- $\alpha$  (PGSC0003DMG400020772,ef1 $\alpha$ ),  
633 (Nicot et al., 2005) were used as the reference genes for normalization and the mock-treated  
634 samples used as calibrators. The comparative  $2^{-\Delta\Delta C_t}$  method was used to determine the relative  
635 fold change according to Schmittgen and Livak (2008). Despite, the two techniques (RNA-seq  
636 and qRT-PCR) being different, the expression patterns of selected genes upon nematode  
637 infection was consistent between the two procedures (**Fig S9**).

638



639 **Data access**

640 Both raw and processed sequencing data have been deposited to the Gene Expression Omnibus  
641 (GEO) repository at the National Center for Biotechnology Information (NCBI) with accession  
642 no. GSE134790.

643 **Acknowledgments**

644 This research study was funded by the National Research Foundation (NRF), South Africa  
645 through Competitive Funding for Rated Researchers (CFRR) 98993, Bioinformatics and  
646 Functional Genomics (BFG 93685) and Potatoes South Africa (PSA). DB-R was supported by  
647 University of Pretoria Post-Doctoral Fellowship. TM was funded by Potato South Africa and  
648 the NRF Scarce Skills/Innovation Scholarships.

649 **Author's Contributions**

650 L.N.M conceived, designed this study and funding acquisition. T.N.M set-up the experiment  
651 for nematode inoculations, analyzed and visualized data and wrote the original draft. D.R.B  
652 carried out the bioinformatics work. L.N.M and D.R.B revised the manuscript. All authors  
653 reviewed and made changes to the initial draft and approved the final version.

654 **Abbreviations:** Cytokinin-CK; Differentially expressed genes-DEGs; Ethylene-ET; Gene  
655 ontology-GO; Giant cells-GCs; Gibberellic acid-GA; Jasmonic acid-JA; Nematode feeding  
656 sites-NFSs; Pathogenesis-related protein-PR; Pattern triggered immunity-PTI; Reactive  
657 oxygen species-ROS; Root-knot nematode-RKN; Salicylic acid-SA; Transcription Factors-  
658 TFs.

659 **Competing Interests:** The authors have no competing interests declare.

660 **References**

- 661 Ali MA, Wieczorek K, Kreil DP, Bohlmann H, 2014. The beet cyst nematode *Heterodera*  
662 *schachtii* modulates the expression of WRKY transcription factors in syncytia to favour its  
663 development in *Arabidopsis* roots. *PLoS One* **9**, e102360.
- 664 Asai T, Tena G, Plotnikova J, *et al.*, 2002. MAP kinase signalling cascade in *Arabidopsis* innate  
665 immunity. *Nature* **415**, 977.
- 666 Bar-Or C, Kapulnik Y, Koltai H, 2005. A broad characterization of the transcriptional profile  
667 of the compatible tomato response to the plant parasitic root knot nematode *Meloidogyne*  
668 *javanica*. *European journal of plant pathology* **111**, 181.
- 669 Bari R, Jones JD, 2009. Role of plant hormones in plant defence responses. *Plant molecular*  
670 *biology* **69**, 473-88.
- 671 Bartlem DG, Jones MG, Hammes UZ, 2013. Vascularization and nutrient delivery at root-knot  
672 nematode feeding sites in host roots. *Journal of Experimental Botany* **65**, 1789-98.
- 673 Benjamini Y, Yekutieli D, 2005. False discovery rate-adjusted multiple confidence intervals  
674 for selected parameters. *Journal of the American Statistical Association* **100**, 71-81.

- 675 Bolger AM, Lohse M, Usadel B, 2014. Trimmomatic: a flexible trimmer for Illumina sequence  
676 data. *Bioinformatics* **30**, 2114-20.
- 677 Castaneda NEN, Alves GSC, Almeida RM, *et al.*, 2017. Gene expression analysis in *Musa*  
678 *acuminata* during compatible interactions with *Meloidogyne incognita*. *Annals of Botany* **119**,  
679 915-30.
- 680 Cheng H-Q, Han L-B, Yang C-L, *et al.*, 2016. The cotton MYB108 forms a positive feedback  
681 regulation loop with CML11 and participates in the defense response against *Verticillium*  
682 *dahliae* infection. *Journal of experimental botany* **67**, 1935-50.
- 683 Chronis D, Chen S, Lu S, *et al.*, 2013. A ubiquitin carboxyl extension protein secreted from a  
684 plant-parasitic nematode *Globodera rostochiensis* is cleaved in planta to promote plant  
685 parasitism. *The Plant Journal* **74**, 185-96.
- 686 Consortium PGS, 2011. Genome sequence and analysis of the tuber crop potato. *Nature* **475**,  
687 189.
- 688 D'maris Amick Dempsey AC, Vlot MCW, Daniel FK, 2011. Salicylic acid biosynthesis and  
689 metabolism. *The Arabidopsis book/American Society of Plant Biologists* **9**.
- 690 Davies LJ, Brown CR, Elling AA, 2015. Calcium is involved in the R Mc1 (blb)-mediated  
691 hypersensitive response against *Meloidogyne chitwoodi* in potato. *Plant cell reports* **34**, 167-  
692 77.
- 693 Denancé N, Szurek B, Noël LD, 2014. Emerging functions of nodulin-like proteins in non-  
694 nodulating plant species. *Plant and cell physiology* **55**, 469-74.
- 695 Dinh PT, Zhang L, Mojtahedi H, Brown CR, Elling AA, 2015. Broad *Meloidogyne* resistance  
696 in potato based on RNA interference of effector gene 16D10. *Journal of nematology* **47**, 71.
- 697 Favery B, Complainville A, Vinardell JM, *et al.*, 2002. The endosymbiosis-induced genes  
698 ENOD40 and CCS52a are involved in endoparasitic-nematode interactions in *Medicago*  
699 *truncatula*. *Molecular plant-microbe interactions* **15**, 1008-13.
- 700 Ferrari S, Savatin DV, Sicilia F, Gramegna G, Cervone F, De Lorenzo G, 2013.  
701 Oligogalacturonides: plant damage-associated molecular patterns and regulators of growth and  
702 development. *Frontiers in Plant Science* **4**, 49.
- 703 Fuchs S, Grill E, Meskiene I, Schweighofer A, 2013. Type 2C protein phosphatases in plants.  
704 *The FEBS journal* **280**, 681-93.
- 705 Gálvez JH, Tai HH, Lagüe M, Zebarth BJ, Strömvik MV, 2016. The nitrogen responsive  
706 transcriptome in potato (*Solanum tuberosum* L.) reveals significant gene regulatory motifs.  
707 *Scientific Reports* **6**, 26090.
- 708 Gao M, Yin X, Yang W, *et al.*, 2017. GDSL lipases modulate immunity through lipid  
709 homeostasis in rice. *PLoS Pathogens* **13**, e1006724.
- 710 Gao X, Starr J, Göbel C, *et al.*, 2008. Maize 9-lipoxygenase ZmLOX3 controls development,  
711 root-specific expression of defense genes, and resistance to root-knot nematodes. *Molecular*  
712 *plant-microbe interactions* **21**, 98-109.
- 713 Gheysen G, Fenoll C, 2002. Gene expression in nematode feeding sites. *Annual review of*  
714 *phytopathology* **40**, 191-219.
- 715 Gheysen G, Mitchum MG, 2008. Molecular insights in the susceptible plant response to  
716 nematode infection.
- 717 Gheysen G, Mitchum MG, 2018. Phytoparasitic nematode control of plant hormone pathways.  
718 *Plant Physiol.*
- 719 Gleason C, Leelarasamee N, Meldau D, Feussner I, 2016. OPDA has key role in regulating  
720 plant susceptibility to the root-knot nematode *Meloidogyne hapla* in *Arabidopsis*. *Frontiers in*  
721 *Plant Science* **7**, 1565.
- 722 Goverse A, Smant G, 2014. The activation and suppression of plant innate immunity by  
723 parasitic nematodes. *Annual review of phytopathology* **52**, 243-65.

- 724 Guan T, Shen J, Fa Y, Su Y, Wang X, Li H, 2017. Resistance-breaking population of  
725 *Meloidogyne incognita* utilizes plant peroxidase to scavenge reactive oxygen species, thereby  
726 promoting parasitism on tomato carrying Mi-1 gene. *Biochemical and biophysical research  
727 communications* **482**, 1-7.
- 728 Hammes UZ, Schachtman DP, Berg RH, *et al.*, 2005. Nematode-induced changes of  
729 transporter gene expression in *Arabidopsis* roots. *Molecular plant-microbe interactions* **18**,  
730 1247-57.
- 731 Hansen BG, Kerwin RE, Ober JA, *et al.*, 2008. A novel 2-oxoacid-dependent dioxygenase  
732 involved in the formation of the goiterogenic 2-hydroxybut-3-enyl glucosinolate and generalist  
733 insect resistance in *Arabidopsis*. *Plant physiology* **148**, 2096-108.
- 734 Hewezi T, Baum TJ, 2013. Manipulation of plant cells by cyst and root-knot nematode  
735 effectors. *Molecular plant-microbe interactions* **26**, 9-16.
- 736 Hirsch S, Oldroyd GE, 2009. GRAS-domain transcription factors that regulate plant  
737 development. *Plant signaling & behavior* **4**, 698-700.
- 738 Hofmann J, El Ashry AEN, Anwar S, Erban A, Kopka J, Grundler F, 2010. Metabolic profiling  
739 reveals local and systemic responses of host plants to nematode parasitism. *The Plant Journal*  
740 **62**, 1058-71.
- 741 Hu Y-X, Tao Y-B, Xu Z-F, 2017. Overexpression of *Jatropha* Gibberellin 2-oxidase 6  
742 (*JcGA2ox6*) Induces Dwarfism and Smaller Leaves, Flowers and Fruits in *Arabidopsis* and  
743 *Jatropha*. *Frontiers in Plant Science* **8**.
- 744 Huang G, Dong R, Allen R, Davis EL, Baum TJ, Hussey RS, 2006. A root-knot nematode  
745 secretory peptide functions as a ligand for a plant transcription factor. *Mol Plant Microbe  
746 Interact* **19**, 463-70.
- 747 Huerta-Cepas J, Forslund K, Coelho LP, *et al.*, 2017. Fast Genome-Wide Functional  
748 Annotation through Orthology Assignment by eggNOG-Mapper. *Mol Biol Evol* **34**, 2115-22.
- 749 Hussey R, 1973. A comparison of methods of collecting inocula of *Meloidogyne* spp.,  
750 including a new technique. *Plant Dis. Rep.* **57**, 1025-8.
- 751 Jagodzic P, Tajdel-Zielinska M, Ciesla A, Marczak M, Ludwikow A, 2018. Mitogen-activated  
752 protein kinase cascades in plant hormone signaling. *Frontiers in Plant Science* **9**.
- 753 Jammes F, Lecomte P, De Almeida-Engler J, *et al.*, 2005. Genome-wide expression profiling  
754 of the host response to root-knot nematode infection in *Arabidopsis* a. *The Plant Journal* **44**,  
755 447-58.
- 756 Jin J, Tian F, Yang D-C, *et al.*, 2016. PlantTFDB 4.0: toward a central hub for transcription  
757 factors and regulatory interactions in plants. *Nucleic Acids Research*, gkw982.
- 758 Jolivet K, Grenier E, Bouchet J-P, *et al.*, 2007. Identification of plant genes regulated in  
759 resistant potato *Solanum sparsipilum* during the early stages of infection by *Globodera pallida*.  
760 *Genome* **50**, 422-7.
- 761 Jones RK, Storey SG, Knoetze R, Fourie H, 2017. Nematode pests of potato and other  
762 vegetable crops. In. *Nematology in South Africa: A View from the 21st Century*. Springer, 231-  
763 60.
- 764 Ju C, Chang C, 2015. Mechanistic insights in ethylene perception and signal transduction. *Plant  
765 Physiology* **169**, 85-95.
- 766 Kim D, Langmead B, Salzberg SL, 2015. HISAT: a fast spliced aligner with low memory  
767 requirements. *Nature methods* **12**, 357.
- 768 Koo AJ, Howe GA, 2009. The wound hormone jasmonate. *Phytochemistry* **70**, 1571-80.
- 769 Kooliyottil R, Dandurand L-M, Kuhl JC, *et al.*, 2019. Transcriptome analysis of *Globodera  
770 pallida* from the susceptible host *Solanum tuberosum* or the resistant plant *Solanum  
771 sisymbriifolium*. *Scientific reports* **9**, 1-8.

- 772 Kwenda S, Motlolometsi TV, Birch PR, Moleleki LN, 2016. RNA-seq profiling reveals  
773 defense responses in a tolerant potato cultivar to stem infection by *Pectobacterium carotovorum*  
774 ssp. *brasiliense*. *Frontiers in Plant Science* **7**, 1905.
- 775 Kyndt T, Denil S, Haegeman A, *et al.*, 2012. Transcriptional reprogramming by root knot and  
776 migratory nematode infection in rice. *New Phytol* **196**, 887-900.
- 777 Laporte D, Olate E, Salinas P, Salazar M, Jordana X, Holuigue L, 2012. Glutaredoxin GRXS13  
778 plays a key role in protection against photooxidative stress in *Arabidopsis*. *Journal of*  
779 *experimental botany* **63**, 503-15.
- 780 Lee DH, Lee IC, Kim KJ, *et al.*, 2014. Expression of gibberellin 2-oxidase 4 from *Arabidopsis*  
781 under the control of a senescence-associated promoter results in a dominant semi-dwarf plant  
782 with normal flowering. *Journal of Plant Biology* **57**, 106-16.
- 783 Li H, Wang Y, Wu M, *et al.*, 2017. Genome-wide identification of AP2/ERF transcription  
784 factors in cauliflower and expression profiling of the ERF family under salt and drought  
785 stresses. *Frontiers in Plant Science* **8**, 946.
- 786 Li X, Xing X, Tian P, *et al.*, 2018. Comparative Transcriptome Profiling Reveals Defense-  
787 Related Genes against *Meloidogyne incognita* Invasion in Tobacco. *Molecules* **23**, 2081.
- 788 Liao Y, Smyth GK, Shi W, 2014. featureCounts: an efficient general purpose program for  
789 assigning sequence reads to genomic features. *Bioinformatics* **30**, 923-30.
- 790 Lin B, Zhuo K, Chen S, *et al.*, 2016. A novel nematode effector suppresses plant immunity by  
791 activating host reactive oxygen species-scavenging system. *New Phytologist* **209**, 1159-73.
- 792 Ling J, Mao Z, Zhai M, Zeng F, Yang Y, Xie B, 2017. Transcriptome profiling of *Cucumis*  
793 *metuliferus* infected by *Meloidogyne incognita* provides new insights into putative defense  
794 regulatory network in Cucurbitaceae. *Sci Rep* **7**, 3544.
- 795 Lionetti V, Cervone F, Bellincampi D, 2012. Methyl esterification of pectin plays a role during  
796 plant-pathogen interactions and affects plant resistance to diseases. *Journal of plant physiology*  
797 **169**, 1623-30.
- 798 Lohar DP, Schaff JE, Laskey JG, Kieber JJ, Bilyeu KD, Bird DM, 2004. Cytokinins play  
799 opposite roles in lateral root formation, and nematode and Rhizobial symbioses. *Plant J* **38**,  
800 203-14.
- 801 López-Galiano MJ, González-Hernández AI, Crespo-Salvador O, *et al.*, 2018. Epigenetic  
802 regulation of the expression of WRKY75 transcription factor in response to biotic and abiotic  
803 stresses in Solanaceae plants. *Plant cell reports* **37**, 167-76.
- 804 Macho AP, Zipfel C, 2014. Plant PRRs and the activation of innate immune signaling.  
805 *Molecular cell* **54**, 263-72.
- 806 McDonald AH, Nicol J, 2005. Nematode parasites of cereals. . *Plant parasitic nematodes in*  
807 *subtropical and tropical agriculture* **2**, 131-92.
- 808 Mendy B, Wang'ombe MW, Radakovic ZS, *et al.*, 2017. *Arabidopsis* leucine-rich repeat  
809 receptor-like kinase NILR1 is required for induction of innate immunity to parasitic  
810 nematodes. *PLoS Pathogens* **13**, e1006284.
- 811 Mengiste T, Chen X, Salmeron J, Dietrich R, 2003. The BOTRYTIS SUSCEPTIBLE1 gene  
812 encodes an R2R3MYB transcription factor protein that is required for biotic and abiotic stress  
813 responses in *Arabidopsis*. *Plant Cell* **15**, 2551-65.
- 814 Moffat CS, Ingle RA, Wathugala DL, Saunders NJ, Knight H, Knight MR, 2012. ERF5 and  
815 ERF6 play redundant roles as positive regulators of JA/Et-mediated defense against *Botrytis*  
816 *cinerea* in *Arabidopsis*. *PLoS One* **7**, e35995.
- 817 Moosavi MR, 2017. The effect of gibberellin and abscisic acid on plant defense responses and  
818 on disease severity caused by *Meloidogyne javanica* on tomato plants. *Journal of general plant*  
819 *pathology* **83**, 173-84.
- 820 Nicot N, Hausman JF, Hoffmann L, Evers D, 2005. Housekeeping gene selection for real-time  
821 RT-PCR normalization in potato during biotic and abiotic stress. *J Exp Bot* **56**.



- 822 Onkendi EM, Kariuki GM, Marais M, Moleleki LN, 2014. The threat of root-knot nematodes  
823 (*Meloidogyne* spp.) in Africa: a review. *Plant pathology* **63**, 727-37.
- 824 Onkendi EM, Moleleki LN, 2013. Distribution and genetic diversity of root-knot nematodes  
825 (*Meloidogyne* spp.) in potatoes from South Africa. *Plant pathology* **62**, 1184-92.
- 826 Ozsolak F, Milos PM, 2011. RNA sequencing: advances, challenges and opportunities. *Nat*  
827 *Rev Genet* **12**, 87-98.
- 828 Patel N, Hamamouch N, Li C, *et al.*, 2010. A nematode effector protein similar to annexins in  
829 host plants. *J Exp Bot* **61**, 235-48.
- 830 Peng H-C, Kaloshian I, 2014. The tomato leucine-rich repeat receptor-like kinases SISERK3A  
831 and SISERK3B have overlapping functions in bacterial and nematode innate immunity. *PLoS*  
832 *One* **9**, e93302.
- 833 Peng H, Han S, Luo M, Gao J, Liu X, Zhao M, 2011. Roles of multidrug transporters of MFS  
834 in plant stress responses. *International Journal of Bioscience, Biochemistry and Bioinformatics*  
835 **1**, 109.
- 836 Pieterse CM, Van Der Does D, Zamioudis C, Leon-Reyes A, Van Wees SC, 2012. Hormonal  
837 modulation of plant immunity. *Annual review of cell and developmental biology* **28**, 489-521.
- 838 Pireyre M, Burow M, 2015. Regulation of MYB and bHLH transcription factors: a glance at  
839 the protein level. *Mol Plant* **8**, 378-88.
- 840 Pofu K, Mashela P, 2017. Host-status of selected South African commercial potato cultivars to  
841 *Meloidogyne incognita* and *Meloidogyne javanica*. *Research on Crops* **18**.
- 842 Postnikova OA, Hult M, Shao J, Skantar A, Nemchinov LG, 2015. Transcriptome analysis of  
843 resistant and susceptible alfalfa cultivars infected with root-knot nematode *Meloidogyne*  
844 *incognita*. *PLoS One* **10**, e0118269.
- 845 Prescott AG, Lloyd MD, 2000. The iron (II) and 2-oxoacid-dependent dioxygenases and their  
846 role in metabolism. *Natural product reports* **17**, 367-83.
- 847 Qiao F, Kong L-A, Peng H, *et al.*, 2019. Transcriptional profiling of wheat (*Triticum aestivum*  
848 L.) during a compatible interaction with the cereal cyst nematode *Heterodera avenae*. *Scientific*  
849 *Reports* **9**, 2184.
- 850 Rehman S, Postma W, Tytgat T, *et al.*, 2009. A secreted SPRY domain-containing protein  
851 (SPRYSEC) from the plant-parasitic nematode *Globodera rostochiensis* interacts with a CC-  
852 NB-LRR protein from a susceptible tomato. *Molecular plant-microbe interactions* **22**, 330-40.
- 853 Robinson MD, McCarthy DJ, Smyth GK, 2010. edgeR: a Bioconductor package for differential  
854 expression analysis of digital gene expression data. *Bioinformatics* **26**, 139-40.
- 855 Rodiuc N, Vieira P, Banora MY, De Almeida Engler J, 2014. On the track of transfer cell  
856 formation by specialized plant-parasitic nematodes. *Frontiers in Plant Science* **5**, 160.
- 857 Rojas CM, Senthil-Kumar M, Tzin V, Mysore K, 2014. Regulation of primary plant  
858 metabolism during plant-pathogen interactions and its contribution to plant defense. *Frontiers*  
859 *in Plant Science* **5**, 17.
- 860 Sanz-Alf6rez S, Mateos B, Alvarado R, S6nchez M, 2008. SAR induction in tomato plants is  
861 not effective against root-knot nematode infection. *European journal of plant pathology* **120**,  
862 417-25.
- 863 Sasser J, Freckman D, 1987. A world perspective on nematology: the role of the society, p 7–  
864 14. *Vistas on nematology*. Society of Nematologists, Hyattsville, MD.
- 865 Sasser JN, Carter CC, Hartman KM, 1984. Standardization of host suitability studies and  
866 reporting of resistance to root-knot nematodes.
- 867 Schmittgen TD, Livak KJ, 2008. Analyzing real-time PCR data by the comparative C T  
868 method. *Nature protocols* **3**, 1101.
- 869 Scurrah M, Niere B, Bridge J, 2005. Nematode parasites of solanum and sweet potatoes. *Plant*  
870 *parasitic nematodes in subtropical and tropical agriculture*, 193-219.

- 871 Seo HS, Song JT, Cheong J-J, *et al.*, 2001. Jasmonic acid carboxyl methyltransferase: a key  
872 enzyme for jasmonate-regulated plant responses. *Proceedings of the National Academy of*  
873 *Sciences* **98**, 4788-93.
- 874 Sharma SK, Bolser D, De Boer J, *et al.*, 2013. Construction of reference chromosome-scale  
875 pseudomolecules for potato: integrating the potato genome with genetic and physical maps. *G3*  
876 *(Bethesda)* **3**, 2031-47.
- 877 Shukla N, Yadav R, Kaur P, *et al.*, 2018. Transcriptome analysis of root-knot nematode  
878 (*Meloidogyne incognita*)-infected tomato (*Solanum lycopersicum*) roots reveals complex gene  
879 expression profiles and metabolic networks of both host and nematode during susceptible and  
880 resistance responses. *Molecular plant pathology* **19**, 615-33.
- 881 Siddique S, Grundler FM, 2015. Metabolism in nematode feeding sites. In. *Advances in*  
882 *botanical research*. Elsevier, 119-38. (73.)
- 883 Siddique S, Radakovic ZS, De La Torre CM, *et al.*, 2015. A parasitic nematode releases  
884 cytokinin that controls cell division and orchestrates feeding site formation in host plants.  
885 *Proceedings of the National Academy of Sciences* **112**, 12669-74.
- 886 Singh KB, Foley RC, Oñate-Sánchez L, 2002. Transcription factors in plant defense and stress  
887 responses. *Current opinion in plant biology* **5**, 430-6.
- 888 Sun H-L, Wang X-J, Ding W-H, *et al.*, 2011. Identification of an important site for function of  
889 the type 2C protein phosphatase ABI2 in abscisic acid signalling in Arabidopsis. *Journal of*  
890 *experimental botany* **62**, 5713-25.
- 891 Takabatake R, Karita E, Seo S, Mitsuhara I, Kuchitsu K, Ohashi Y, 2007. Pathogen-induced  
892 calmodulin isoforms in basal resistance against bacterial and fungal pathogens in tobacco.  
893 *Plant and cell physiology* **48**, 414-23.
- 894 Taylor AL, Sasser JN, 1978. Biology, identification and control of root-knot nematodes  
895 (*Meloidogyne* species). *Biology, identification and control of root-knot nematodes*  
896 *(Meloidogyne species)*.
- 897 Teixeira MA, Wei L, Kaloshian I, 2016. Root-knot nematodes induce pattern-triggered  
898 immunity in Arabidopsis thaliana roots. *New Phytologist* **211**, 276-87.
- 899 Tian T, Liu Y, Yan H, *et al.*, 2017. agriGO v2.0: a GO analysis toolkit for the agricultural  
900 community, 2017 update. *Nucleic Acids Res* **45**, W122-w9.
- 901 Van Dam NM, Wondafra M, Mathur V, Tytgat TOG, 2018. Differences in Hormonal  
902 Signaling Triggered by Two Root-Feeding Nematode Species Result in Contrasting Effects on  
903 Aphid Population Growth. *Frontiers in Ecology and Evolution* **6**.
- 904 Van Loon LC, Rep M, Pieterse CM, 2006. Significance of inducible defense-related proteins  
905 in infected plants. *Annu. Rev. Phytopathol.* **44**, 135-62.
- 906 Vieira P, Gleason C, 2019. Plant-parasitic nematode effectors—Insights into their diversity and  
907 new tools for their identification. *Current opinion in plant biology* **50**, 37-43.
- 908 Vogt T, 2010. Phenylpropanoid biosynthesis. *Molecular plant* **3**, 2-20.
- 909 Voigt CA, 2014. Callose-mediated resistance to pathogenic intruders in plant defense-related  
910 papillae. *Frontiers in Plant Science* **5**, 168.
- 911 Vovlas N, Mifsud D, Landa BB, Castillo P, 2005. Pathogenicity of the root-knot nematode  
912 *Meloidogyne javanica* on potato. *Plant pathology* **54**, 657-64.
- 913 Walter AJ, Willforss J, Lenman M, Alexandersson E, Andreasson E, 2018. RNA seq analysis  
914 of potato cyst nematode interactions with resistant and susceptible potato roots. *European*  
915 *journal of plant pathology* **152**, 531-9.
- 916 Wang J, Qu B, Dou S, *et al.*, 2015. The E3 ligase OsPUB15 interacts with the receptor-like  
917 kinase PID2 and regulates plant cell death and innate immunity. *BMC plant biology* **15**, 49.
- 918 Wang X, Yan Y, Li Y, Chu X, Wu C, Guo X, 2014. GhWRKY40, a multiple stress-responsive  
919 cotton WRKY gene, plays an important role in the wounding response and enhances



- 920 susceptibility to *Ralstonia solanacearum* infection in transgenic *Nicotiana benthamiana*. *PLoS*  
921 *One* **9**, e93577.
- 922 Wang Z, Gerstein M, Snyder M, 2009. RNA-Seq: a revolutionary tool for transcriptomics. *Nat*  
923 *Rev Genet* **10**, 57-63.
- 924 Warmerdam S, Sterken MG, Van Schaik C, *et al.*, 2019. Mediator of tolerance to abiotic stress  
925 ERF6 regulates susceptibility of *Arabidopsis* to *Meloidogyne incognita*. *Mol Plant Pathol* **20**,  
926 137-52.
- 927 Williamson VM, Kumar A, 2006. Nematode resistance in plants: the battle underground.  
928 *TRENDS in Genetics* **22**, 396-403.
- 929 Wright D, Perry R, Rahimi S, 1998. Detection of chitinases in potato plants following infection  
930 with the potato cyst nematodes, *Globodera rostochiensis* and *G. pallida*. *Nematologica* **44**, 181-  
931 93.
- 932 Xing X, Li X, Zhang M, *et al.*, 2017. Transcriptome analysis of resistant and susceptible  
933 tobacco (*Nicotiana tabacum*) in response to root-knot nematode *Meloidogyne incognita*  
934 infection. *Biochemical and biophysical research communications* **482**, 1114-21.
- 935 Yang X, Guo X, Yang Y, *et al.*, 2018. Gene Profiling in Late Blight Resistance in Potato  
936 Genotype SD20. *International journal of molecular sciences* **19**, 1728.
- 937 Ye J, Zhang Y, Cui H, *et al.*, 2018. WEGO 2.0: a web tool for analyzing and plotting GO  
938 annotations, 2018 update. *Nucleic Acids Research*.
- 939 You Q, Zhai K, Yang D, *et al.*, 2016. An E3 ubiquitin ligase-BAG protein module controls  
940 plant innate immunity and broad-spectrum disease resistance. *Cell host & microbe* **20**, 758-69.
- 941 Zhang H, Kjemtrup-Lovelace S, Li C, Luo Y, Chen LP, Song B-H, 2017. Comparative RNA-  
942 seq analysis uncovers a complex regulatory network for soybean cyst nematode resistance in  
943 wild soybean (*Glycine soja*). *Scientific Reports* **7**, 9699.
- 944 Zhang L, Du L, Poovaiah B, 2014. Calcium signaling and biotic defense responses in plants.  
945 *Plant signaling & behavior* **9**, e973818.
- 946 Zhao D, You Y, Fan H, *et al.*, 2018. The role of sugar transporter genes during early infection  
947 by root-knot nematodes. *International journal of molecular sciences* **19**, 302.
- 948 Zhou M-L, Ma J-T, Pang J-F, Zhang Z-L, Tang Y-X, Wu Y-M, 2010. Regulation of plant stress  
949 response by dehydration responsive element binding (DREB) transcription factors. *African*  
950 *Journal of Biotechnology* **9**, 9255-69.
- 951 Zipfel C, 2014. Plant pattern-recognition receptors. *Trends in immunology* **35**, 345-51.
- 952 Zuluaga AP, Sole M, Lu H, *et al.*, 2015. Transcriptome responses to *Ralstonia solanacearum*  
953 infection in the roots of the wild potato *Solanum commersonii*. *BMC Genomics* **16**, 246.
- 954

955 **Figures**

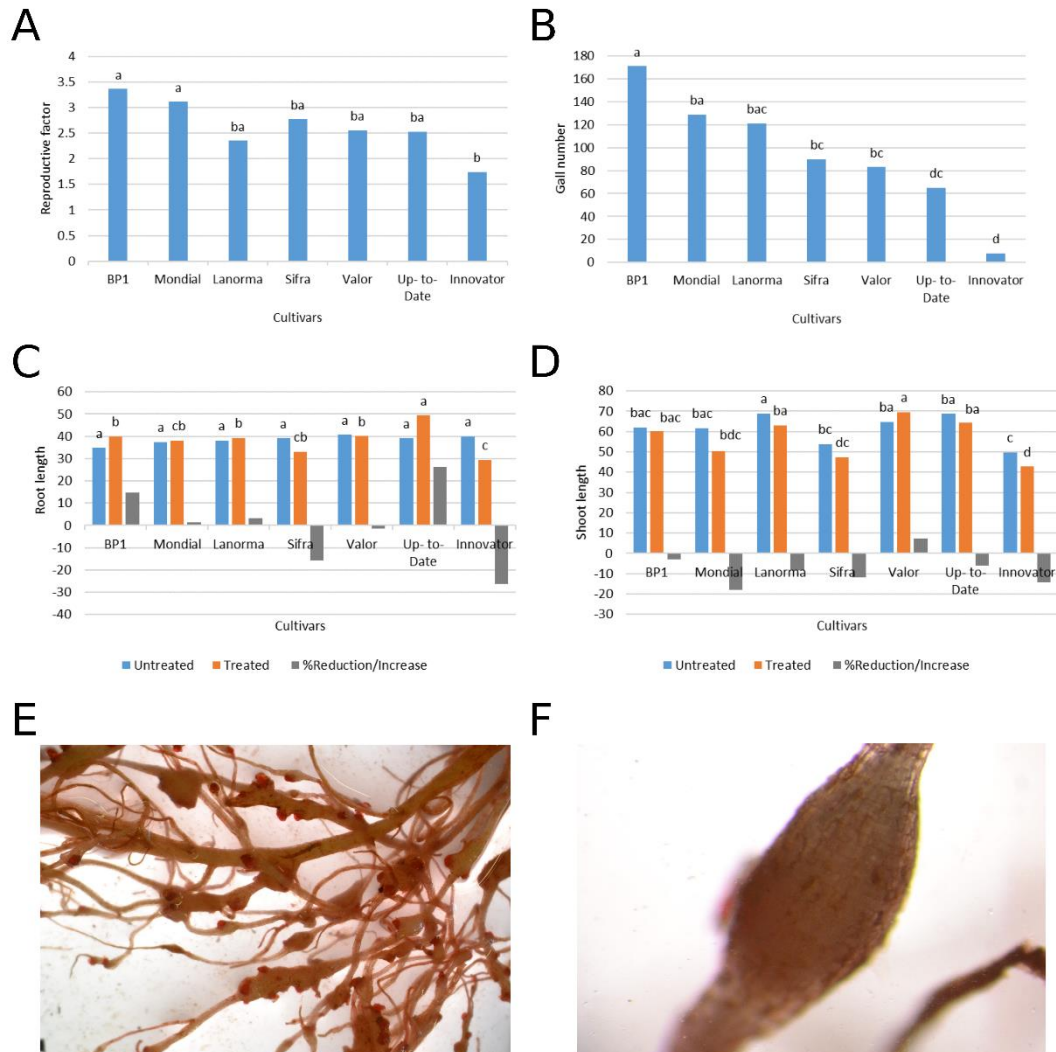

**Figure 1:** Responses of seven potato cultivars to *M. javanica* infection. (A) and (B) Reproductive factor and the number of galls, respectively induced by RKN. (C) and (D) Show the effect of nematode infection on root length and shoot length of potato cultivars. % increase or reduction =  $\frac{Untreated - Treated}{Untreated} \times 100$ . Values are means of five replicates. Statistical significance between the cultivars was determined by one-way ANOVA analysis with Fisher's least significant difference test at  $P < 0.05$ . (E) and (F) show nematode damage on potato roots, the egg masses stained pink and a mature gall, respectively.

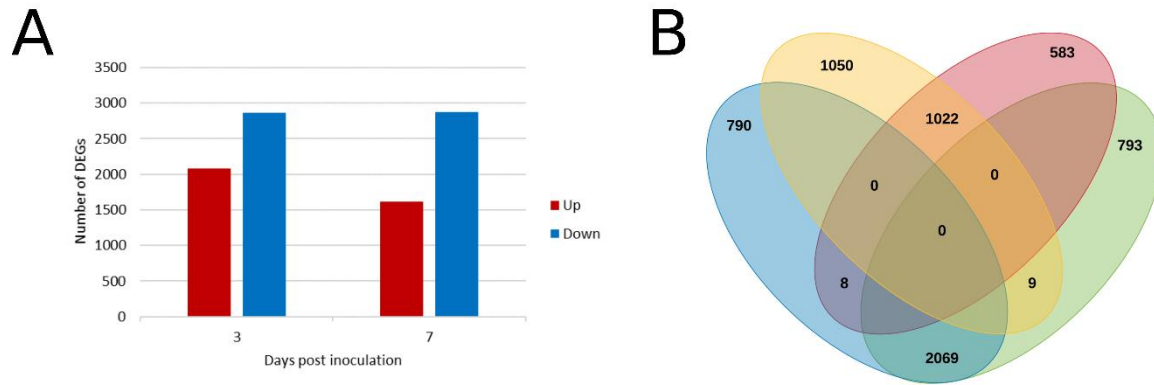

**Figure 2:** Schematic representation of DEGs in potato roots following *M. javanica* infection **(A)** Number of differentially expressed genes detected at 3 and 7 dpi compared to the mock-inoculated samples. ‘Down’ designates down-regulated genes. ‘Up’ designates up-regulated genes. **(B)** Venn diagram of the distribution of DEGs between 3 and 7 dpi. Yellow and blue ovals represent up-regulated and down-regulated DEGs at 3dpi, respectively. Red and green ovals indicate the genes upregulated and downregulated at 7 dpi, respectively.

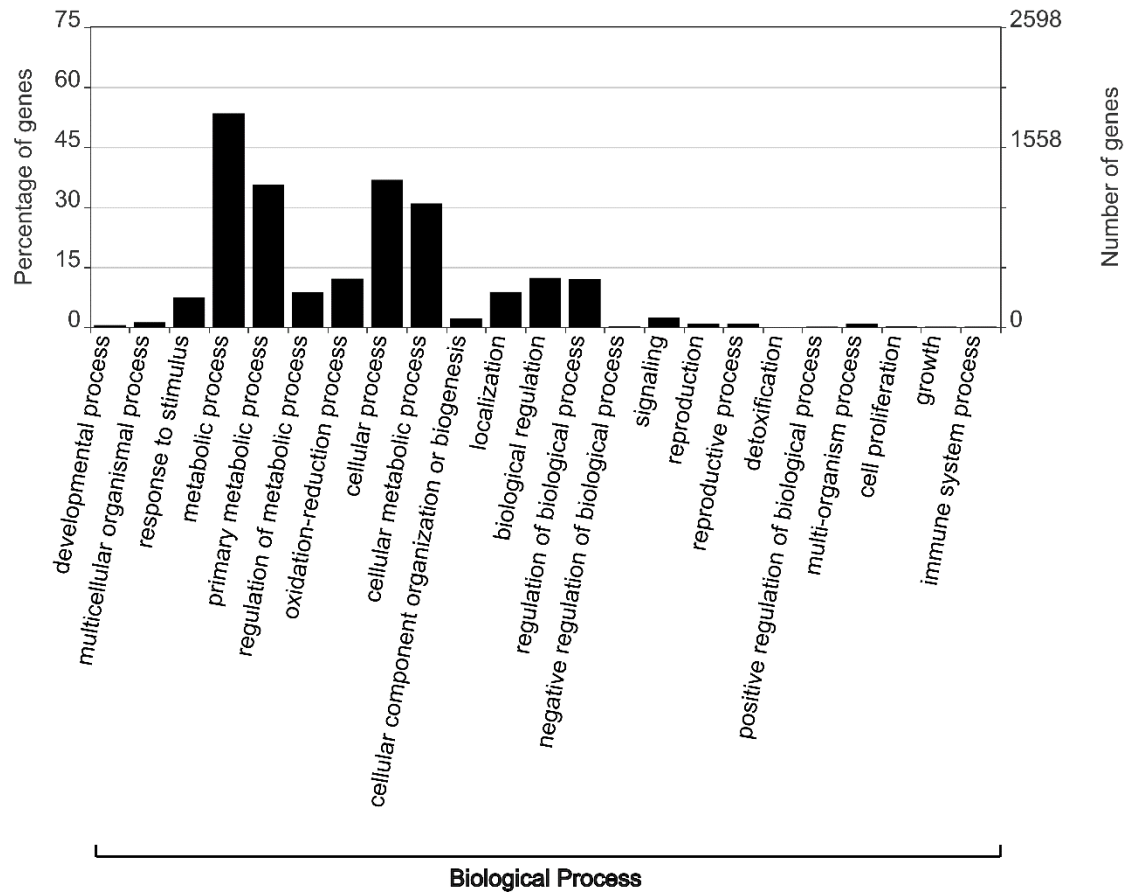

**Figure 3:** A representation of GO analysis demonstrates the percentage of DEGs enriched within the Biological Process category.

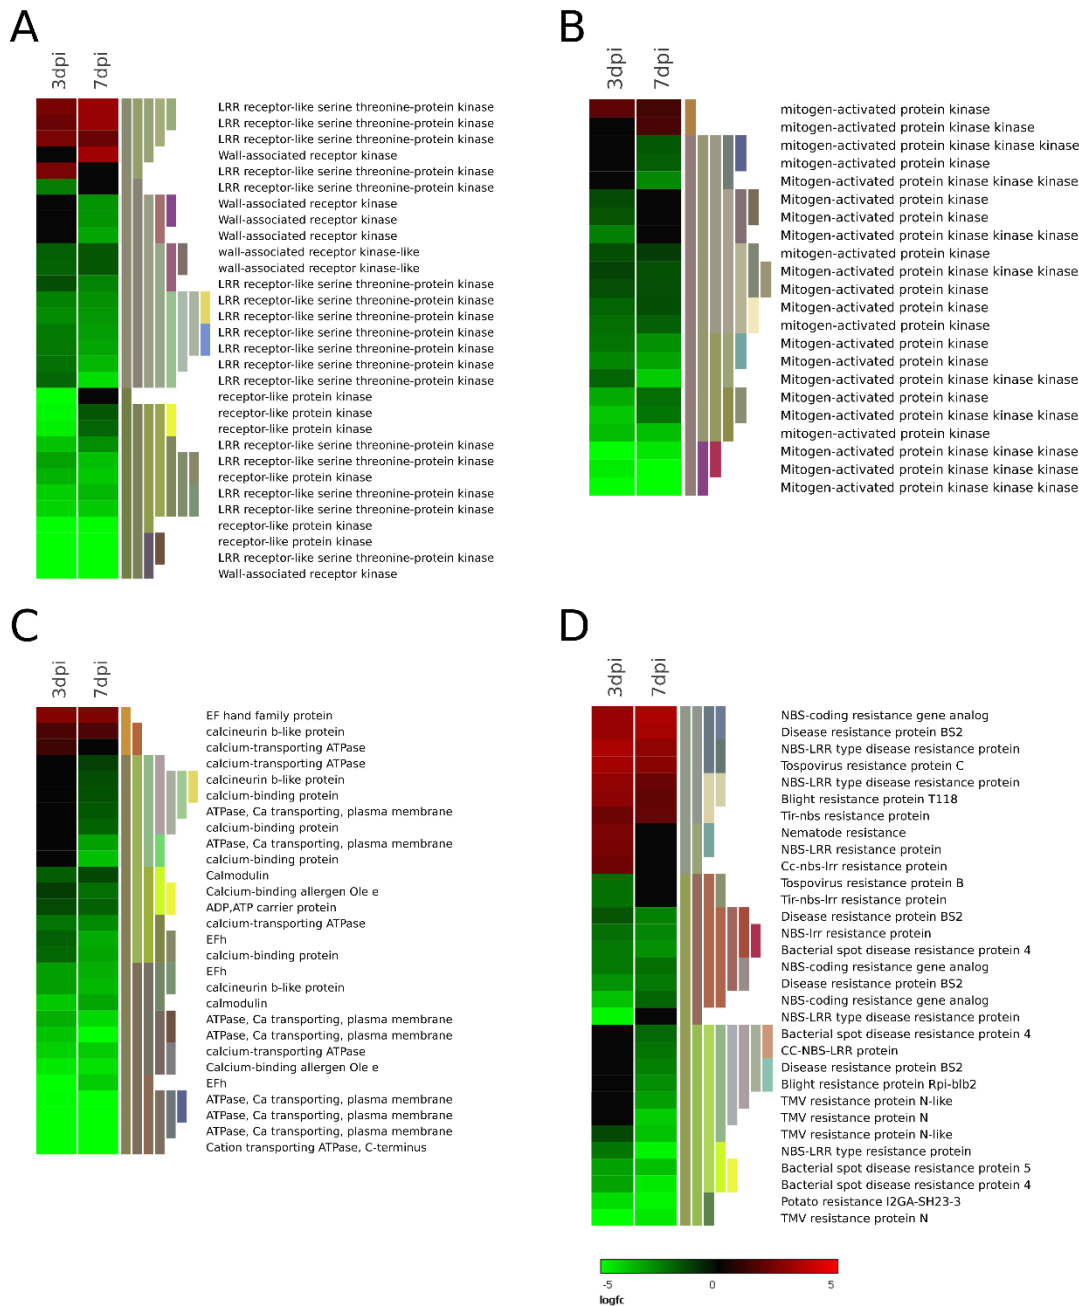

957

**Figure 4:** Heat map representation of selected DEGs associated with pathogen perception (**A**) PRRs-RLKs, RLPs and WAKs (**B**) MAPK signaling pathways (**C**) Ca<sup>2+</sup> signaling pathways, and Disease resistance proteins. (**D**) (The heat map illustrates a subset of genes from each group. Refer supporting information for all DEGs in each group).



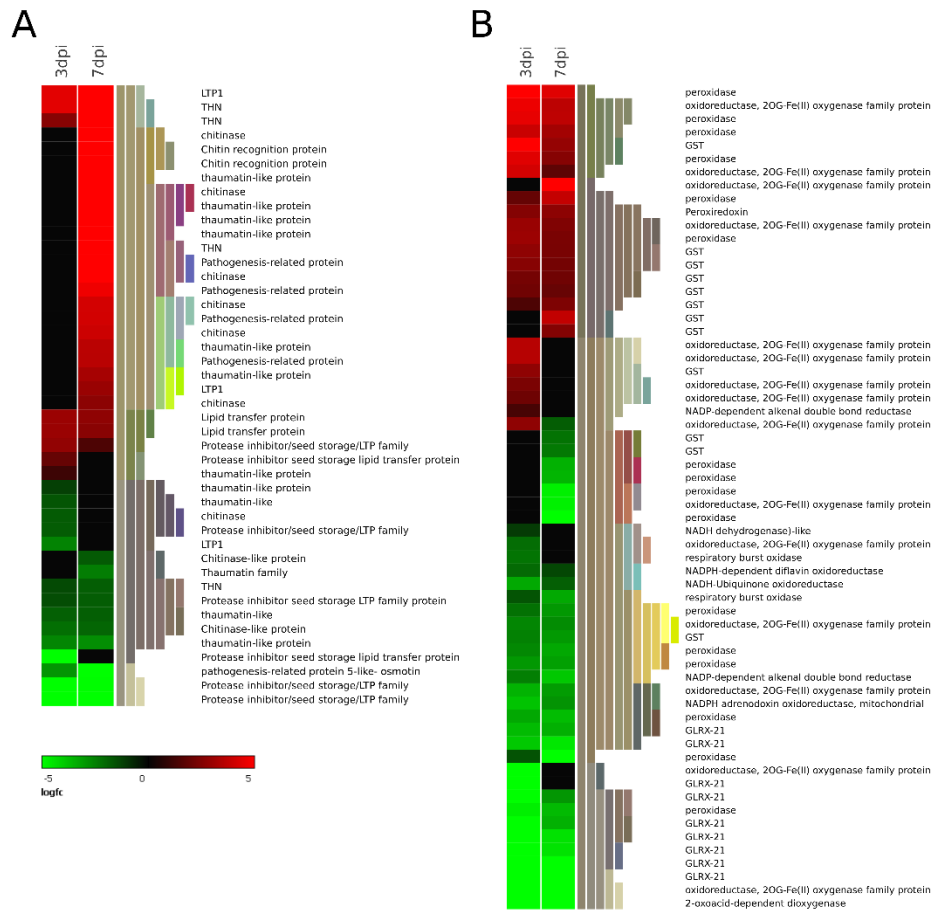

**Figure 5:** Heat map representation of selected DEGs associated with plant defense **(A)** Pathogenesis-related protein. **(B)** Oxidative stress-related gene (The heat map illustrates a subset of genes from each group. Refer to supporting information for all DEGs in each group).

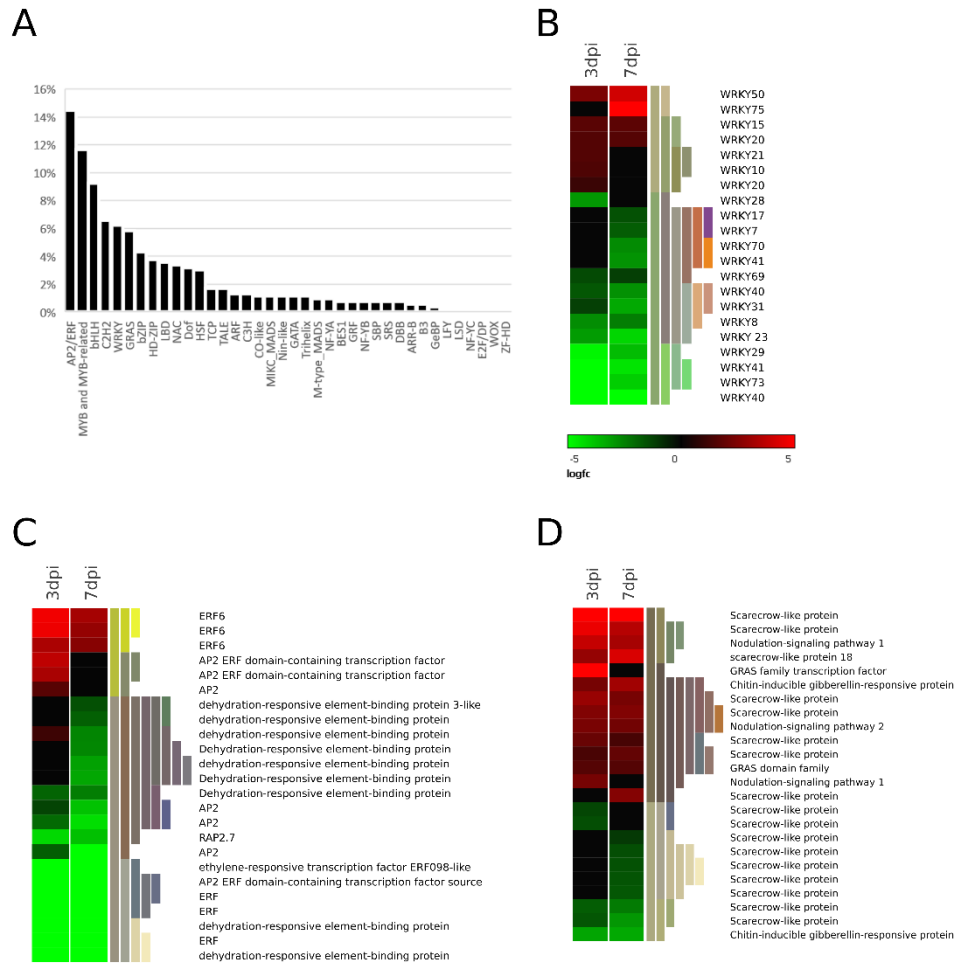

**Figure 6:** Heat map representation of differential regulation of TFs. **(A)** Represents various families of TFs under the regulation of RKN. **(B)** WRKY family. **(C)** AP2/ERF family. **(D)** GRAS family. (The heat map represents a subset of the differentially expressed family of TFs. Refer to supporting information for all TFs family displaying differential expression).

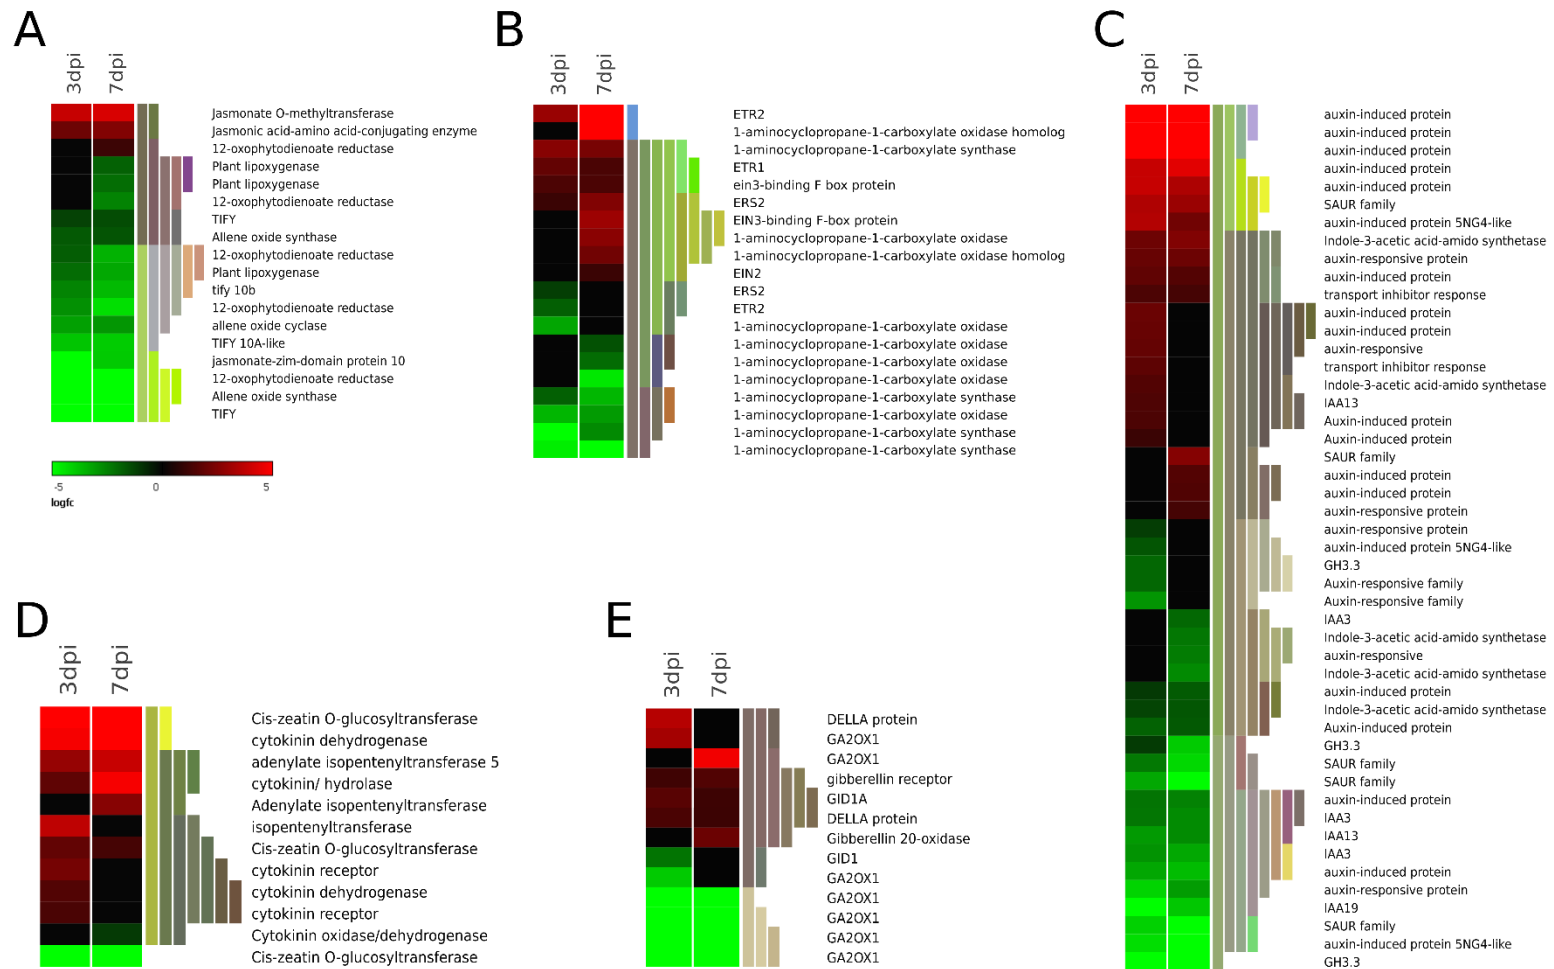

**Figure 7:** Heat map illustration of DEGs involved in hormone signal transduction. **(A)** JA signaling pathway. **(B)** ET signaling pathway. **(C)** Auxin signaling pathway. **(D)** Cytokinin signaling pathway. **(E)** GA signaling pathway. (The heat map illustrates a subset of genes from each group. Refer supporting information for all DEGs in each group).

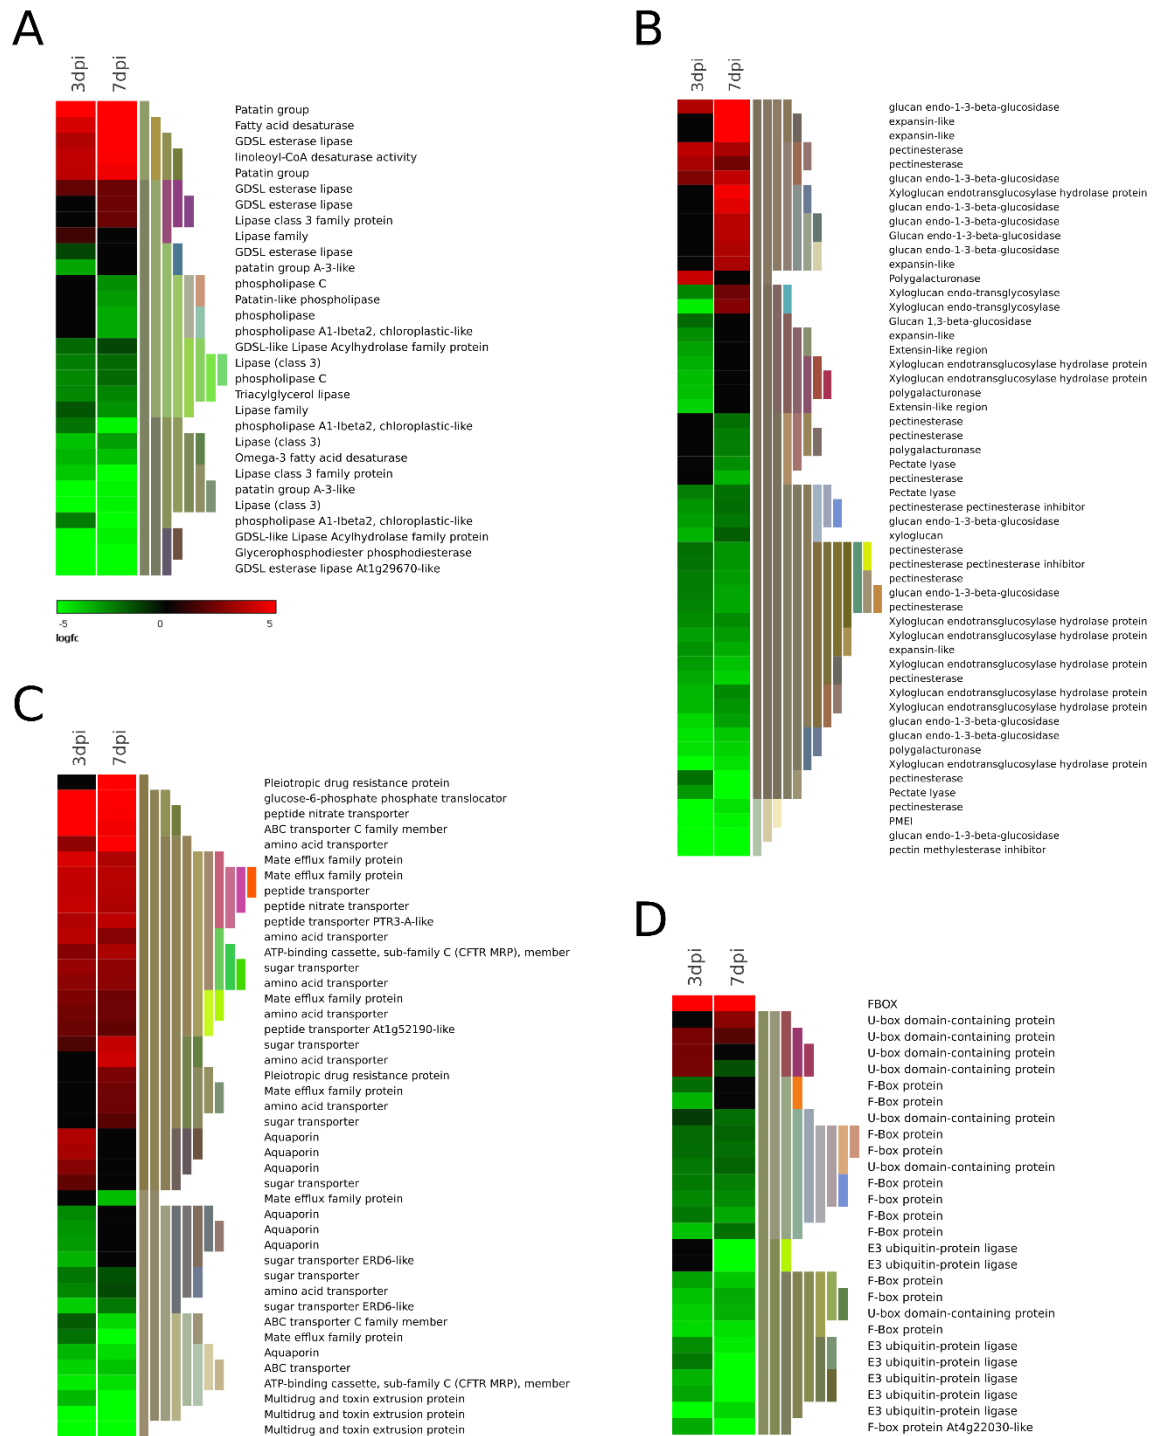

**Figure 8:** Heat map representation of gene expression patterns of genes associated with metabolism and transport activity **(A)** Lipid metabolism. **(B)** Cell wall architecture. **(C)** Transporters **(D)** Proteolysis and ubiquitination processes. (The heat map illustrates a subset of genes from each group. Refer supporting information for all DEGs in each group).
